## **Male pheromones modulate synaptic transmission at the *C. elegans* neuromuscular junction in a sexually dimorphic manner**

Kang-Ying Qian<sup>1,4,5</sup>, Wan-Xin Zeng<sup>1,4,5</sup>, Yue Hao<sup>1,4,5</sup>, Xian-Ting Zeng<sup>1</sup>, Haowen Liu<sup>8</sup>, Lei Li<sup>8</sup>, Lili Chen<sup>9</sup>, Fu-min Tian<sup>1</sup>, Cindy Chang<sup>6,7</sup>, Qi Hall<sup>6,7</sup>, Chun-Xue Song<sup>2,3</sup>, Shangbang Gao<sup>9</sup>, Zhi-Tao Hu<sup>8</sup>, Joshua M Kaplan<sup>6,7</sup>, Qian Li<sup>2,3,\*</sup> and Xia-Jing Tong<sup>1,10,\*</sup>

<sup>1</sup>School of Life Science and Technology, ShanghaiTech University, Shanghai 201210, China.

<sup>2</sup>Center for Brain Science, Shanghai Children's Medical Center, Department of Anatomy and Physiology, Shanghai Jiao Tong University School of Medicine, Shanghai 200025, China.

<sup>3</sup>Shanghai Research Center for Brain Science and Brain-Inspired Intelligence, Shanghai 201210, China.

<sup>4</sup>Institute of Neuroscience, Shanghai Institutes for Biological Sciences, Chinese Academy of Sciences, Shanghai 200031, China.

<sup>5</sup>University of Chinese Academy of Sciences, Beijing 100190, China.

<sup>6</sup>Department of Molecular Biology, Massachusetts General Hospital, Boston, MA 02114, USA.

<sup>7</sup>Department of Neurobiology, Harvard Medical School, Boston, MA 02115, USA

<sup>8</sup>Queensland Brain Institute, Clem Jones Centre for Ageing Dementia Research (CJCADR), The University of Queensland, Brisbane, QLD 4072, Australia

<sup>9</sup>College of Life Science and Technology, Huazhong University of Science and Technology, Wuhan, 430074, China.

<sup>10</sup>Lead Contact

\*Correspondence: liqian@shsmu.edu.cn (Q.L.), tongxj@shanghaitech.edu.cn (X-J.T.)

1 **SUMMARY**

2 The development of functional synapses in the nervous system is important for animal  
3 physiology and behaviors. The synaptic transmission efficacy can be modulated by the  
4 environment to accommodate external changes, which is crucial for animal reproduction and  
5 survival. However, the underlying plasticity of synaptic transmission remains poorly  
6 understood. Here we show that in *C. elegans*, the male pheromone increases the  
7 hermaphrodite cholinergic transmission at the neuromuscular junction (NMJ), which alters  
8 hermaphrodites' locomotion velocity and mating efficiency in a developmental stage-  
9 dependent manner. Dissection of the sensory circuits reveals that the AWB chemosensory  
10 neurons sense those male pheromones and further transduce the information to NMJ using  
11 cGMP signaling. Exposure of hermaphrodites to male pheromones specifically increases the  
12 accumulation of presynaptic CaV2 calcium channels and clustering of postsynaptic receptors  
13 at cholinergic synapses of NMJ, which potentiates cholinergic synaptic transmission. Thus,  
14 our study demonstrates a circuit mechanism for synaptic modulation by sexual dimorphic  
15 pheromones.

16

17 **Keywords:** synaptic transmission, neuromuscular junction (NMJ), acetylcholine receptor,  
18 CaV2 calcium channel, pheromone, chemosensory neuron, sexual dimorphism

## 1 INTRODUCTION

2 Faithful synaptic transmission is essential for animal physiology and behaviors. The  
3 disturbance of synaptic transmission has been linked with several neurodevelopmental  
4 disorders, including autism spectrum disorders (ASD). In the past decades, researchers have  
5 identified numerous genes encoding synaptic proteins that are linked with  
6 neurodevelopmental disorders, and their mutations cause the dysregulated synaptic  
7 transmission in human diseases (Doan et al., 2016; Doan et al., 2019; Geisheker et al., 2017;  
8 Iossifov et al., 2012; Lee et al., 2019; Morrow et al., 2008; Neale et al., 2012; Yuen et al.,  
9 2017), including *SHANK3*, *NRXN*, and *NL* for autism (Chen et al., 2020; Lee et al., 2015;  
10 Levinson and El-Husseini, 2005; Orefice et al., 2019; Sudhof, 2008), *MECP2* for Rett's  
11 syndrome (Chao et al., 2007; Orefice et al., 2019), *FMR1* for Fragile X syndrome (Olmos-  
12 Serrano et al., 2010), and *UBE3* for Angelman syndrome (Judson et al., 2016; Wallace et al.,  
13 2012).

14  
15 The process of synaptogenesis occurs in the early postnatal developmental period,  
16 and can be modulated by the environment. The effects of synaptic modulation could persist  
17 until adulthood and cause a lifelong impact. Various environmental contexts can modulate  
18 synaptic transmission and behaviors through experience-dependent plasticity, which provides  
19 a critical and conserved mechanism to generate animal behavior diversity and adaptation.  
20 Among the environmental contexts, social interaction, such as the density of the conspecifics  
21 sharing the same habitat, represents one of the most important environmental conditions that  
22 modulate animal physiology and behaviors to meet the ever-changing environment and  
23 internal needs (Chen and Hong, 2018). For example, social isolation of rats during the critical  
24 period of adolescence enhances long-term potentiation of NMDA receptor-mediated  
25 glutamatergic transmission in the ventral tegmental area (Whitaker et al., 2013). Besides that,  
26 maternal separation has been found to have a profound lifelong influence on animal models  
27 at a mature stage of life. It causes habenula hyperexcitability, AMPA receptors delivery, and  
28 synaptic plasticity defects in the developing barrel cortex (Miyazaki et al., 2012; Tchenio et al.,

1 2017). However, the underlying mechanism on how social interaction modulates synaptic  
2 transmission remains elusive.

3

4       There are many ways in which social interaction can influence neural development.  
5 Pheromone effects between conspecifics are strong drivers that modulate behaviors and alter  
6 physiology, allowing appropriate responses to particular social environments (Liberles, 2014).  
7 These effects are often sexually dimorphic. Mouse pups elicit parental care behaviors in virgin  
8 females, for instance, but promote infanticidal behaviors in virgin males through pheromonal  
9 compounds (submandibular gland protein C and hemoglobins) and physical traits (Isogai et  
10 al., 2018). In *C. elegans*, a family of glycolipids called ascarosides function as pheromones  
11 to mediate social interactions. Males and hermaphrodites secrete several ascarosides in  
12 different amounts that elicit sexual dimorphic responses (Butcher et al., 2007; Edison, 2009;  
13 Greene et al., 2016; Srinivasan et al., 2008; Srinivasan et al., 2012). For example, the male-  
14 enriched *ascr#10* induces attraction behavior in hermaphrodites, but causes aversion  
15 behavior in males (Izrayelit et al., 2012). However, it remains unclear whether and how specific  
16 pheromone-mediated effects are involved in neurodevelopmental processes, including  
17 synaptogenesis and synaptic transmission.

18

19       Here, we show that the male environment increases the cholinergic synaptic  
20 transmission at the neuromuscular junction (NMJ) in *C. elegans* hermaphrodites, decreasing  
21 hermaphrodites locomotion activity and promotes mating efficiency. The male-specific  
22 pheromones (ascarosides) mediate these effects in a sexually dimorphic manner. Such  
23 ascaroside-mediated modulation of the cholinergic synaptic transmission is developmental  
24 stage-dependent. We further used various neuron-type-specific ablation experiments to  
25 confirm that these male-specific pheromone signals are received and processed by the AWB  
26 chemosensory neuron pair in hermaphrodites. Upon reception, AWB neurons transduce the  
27 information to the NMJ using cGMP signaling. Furthermore, we used multiple reporter fusion  
28 constructs to show that the male-specific pheromones cause increased calcium channel

1 accumulation and acetylcholine receptor (AChR) clustering at cholinergic synapses.  
2 Collectively, our work elucidates how individuals sense and adapt to the social environment,  
3 providing insights into how pheromones regulate the development and function of the nervous  
4 system.

5

## 6 **RESULTS**

### 7 **The male environment modulates synaptic transmission at the hermaphrodite NMJ**

8 *C. elegans* has two sexes: hermaphrodites and males. The somatically female  
9 hermaphrodites can produce hermaphrodite progeny by self-fertilization, whereas in the  
10 presence of males, they are also able to mate with males to give rise to equal ratios of  
11 hermaphrodites and males (Fig. 1A). Hermaphrodites generated by self-fertilization or by  
12 crossing share the same genetic background but develop in distinct environments (*i.e.*, in the  
13 presence or absence of males). Therefore, it provides an excellent system to study how social  
14 interaction modulates the establishment and maintenance of synaptic transmission during  
15 development. We selected the *C. elegans* NMJ as a model to examine the male environment's  
16 effects on synaptic transmission. The *C. elegans* NMJ includes body-wall muscles that receive  
17 synaptic inputs from both excitatory cholinergic and inhibitory GABAergic motor neurons  
18 (Richmond and Jorgensen, 1999). The coordination of excitatory and inhibitory innervations  
19 guarantees *C. elegans* sinusoidal movement. In the presence of acetylcholinesterase  
20 inhibitors such as aldicarb, the breakdown of acetylcholine is prevented, and acetylcholine  
21 accumulates over time at synapses. As a result, worms become paralyzed due to hyper-  
22 excitation (Mahoney et al., 2006). The timing of the paralysis is influenced by the inhibitory  
23 innervations from GABAergic neurons that counteract acetylcholine's excitatory effect and  
24 delay paralysis. The percentage of paralyzed worms over time can be used as a measurement  
25 of excitatory versus inhibitory synaptic transmission ratio (E/I ratio) at the NMJ. As a result,  
26 the alteration of sensitivity to aldicarb reflects the changes in NMJ synaptic transmission  
27 (Vashlishan et al., 2008).

1 To determine whether the NMJ synaptic transmission differs between hermaphrodites  
2 generated through self-fertilization versus crossing, we applied aldicarb to young adult  
3 hermaphrodites and examined the percentage of paralyzed animals. We found that around  
4 39.8% of hermaphrodites from self-fertilization were paralyzed after 70 minutes' exposure to  
5 aldicarb. In contrast, almost all of the hermaphrodites from crossing were paralyzed (Fig. 1B),  
6 indicating that hermaphrodites obtained by crossing are more sensitive to aldicarb. Thus, the  
7 NMJ E/I ratio is increased in crossed hermaphrodites than those obtained by self-fertilization.

8 There are three possible explanations for the observed differences in NMJ synaptic  
9 transmission in crossed hermaphrodites: first, it could be a parental inheritance effect, such  
10 as RNA transgenerational transmission (Alcazar et al., 2008; Rechavi et al., 2011); second, it  
11 could be caused by direct contact with males (Shi and Murphy, 2014); third, male metabolites  
12 secreted into the environment could modulate hermaphrodite development. To rule out the  
13 potential effects of parental inheritance and male contact, we directly exposed hermaphrodites  
14 from self-fertilization to medium conditioned by either the male or the hermaphrodite  
15 environment since egg stage. The conditioned medium was prepared by collecting cultures of  
16 *him-5* mutants containing around 40% males (male-conditioned medium) or wild type  
17 hermaphrodites alone (hermaphrodite-conditioned medium). Both conditioned media contain  
18 metabolites secreted by 30,000 young adult worms during three-hour cultivation (Fig. 1C).  
19 After growing hermaphrodites in the conditioned medium, we found that the hermaphrodites  
20 cultured in the male-conditioned medium became paralyzed earlier than those in the  
21 hermaphrodite-conditioned medium (80.31% vs. 61.11% paralyzed after 70 minutes'  
22 exposure to aldicarb) (Fig. 1D). This result suggests that the effect of the male environment  
23 on hermaphrodite NMJ is mediated by male-secreted metabolites. In the following  
24 experiments, we directly used the male-conditioned medium and hermaphrodite-conditioned  
25 medium unless otherwise specified.

26 We then analyzed muscle excitability as another independent measure of synaptic  
27 transmission changes at the NMJ. Previous work has shown that the body-wall muscle at the  
28 *C. elegans* NMJ receives both excitatory and inhibitory inputs from cholinergic and GABAergic

1 neurons, respectively (Richmond and Jorgensen, 1999). When the excitatory and inhibitory  
2 synaptic transmission ratio increases at the NMJ, the excitability of muscle cells should  
3 increase. To verify the increased excitability of the body-wall muscle, we expressed the  
4 genetically encoded calcium indicator GCaMP3 in muscle cells (under the *myo-3* promoter)  
5 and the channelrhodopsin variant Chrimson in VB and DB motor neurons (under the *acr-5*  
6 promoter) (Fig. 1E) (Tian et al., 2009). Fluorescence changes reflect calcium influx and  
7 excitability in the GCaMP3-expressing cells. We found that the baseline GCaMP3  
8 fluorescence is higher in hermaphrodites grown in the male-conditioned medium compared  
9 with those grown in the hermaphrodite-conditioned medium, suggesting relatively higher  
10 resting muscle excitability (Supplementary Fig. 1A-B). Moreover, we excited the VB and DB  
11 cholinergic motor neurons via optogenetic activation of Chrimson with red light (wavelength at  
12 640 nm) (Klapoetke et al., 2014), and observed significantly increased GCaMP3 fluorescence  
13 intensity potentiation (assessed as  $\Delta F/F$ ) in hermaphrodites grown in the male-conditioned  
14 medium (Fig. 1F-G). These results indicate that the male excretome environment causes  
15 increased excitatory and inhibitory synaptic transmission ratio and muscle excitability at the  
16 NMJ of hermaphrodites.

17

### 18 **The acetylcholine transmission rate at the NMJ is potentiated by the male excretome** 19 **environment**

20 The increased E/I ratio could be caused by either increased cholinergic transmission  
21 or decreased GABAergic transmission. To distinguish between these two possibilities, we  
22 analyzed spontaneous miniature excitatory postsynaptic currents (mEPSCs) and miniature  
23 inhibitory postsynaptic currents (mIPSCs) at the NMJ. We found that the mEPSC frequency  
24 was significantly increased in hermaphrodites from male-conditioned medium compared to  
25 those from hermaphrodite-conditioned medium (Fig. 1H-I), but the mEPSC amplitude was not  
26 changed (Fig. 1H, 1J). When we examined inhibitory postsynaptic currents, we detected no  
27 significant differences in mIPSC frequency and amplitude between hermaphrodites from male-

1 or hermaphrodite-conditioned medium (Fig. 1K-M). The electrophysiology data suggest that  
2 potentiation of acetylcholine transmission rate mainly contributes to the observed increase in  
3 the E/I ratio at the NMJ of hermaphrodites in the male excretome environment.

4

### 5 **The male excretome environment increases the hermaphrodite NMJ synaptic** 6 **transmission during the juvenile stage**

7 To delineate if there are any critical developmental windows for the observed synaptic  
8 transmission modulation by the male environment, we transferred hermaphrodites to male-  
9 conditioned medium at a series of different developmental stages (egg, L1 [24 hours after  
10 egg], L2-L3 [36 hours after egg], and mid-L4 [48 hours after egg]). We then measured their  
11 synaptic transmission in young adults with the aldicarb assay (Fig. 2A). The hermaphrodites  
12 transferred to the male-conditioned medium at the egg, L1, and L2-L3 stage presented  
13 significantly increased sensitivity to aldicarb when they grow into young adult (Fig. 2B and  
14 Supplementary Fig. 2A-C, 92.5% vs. 55.1% at 70 minutes for egg stage, 46.9% vs. 24.9% for  
15 the L1 stage, and 71.3% vs. 14.0% for L2-L3 stage). In contrast, we observed no differences  
16 in sensitivity to aldicarb between hermaphrodites transferred to male-conditioned medium at  
17 the mid-L4 stage and those from hermaphrodite-conditioned medium (Fig. 2B and  
18 Supplementary Fig. 2D, 15.9% vs. 14.0% at 70 minutes). Those data suggest that exposure  
19 to the male excretome environment in L3-L4 stage is critical for modulation of the NMJ  
20 synaptic transmission in hermaphrodites.

21 To study whether the sustained male environment is required to maintain the  
22 cholinergic synaptic transmission potentiation at NMJ, we removed hermaphrodites from  
23 male-conditioned medium out of the male environment at L4 (48 hours after egg) and young  
24 adult (60 hours after egg). 24 and 12 hours later, we performed the aldicarb assay (Fig. 2A,  
25 2C, and Supplementary Fig. 2E). We found that hermaphrodites leaving the male excretome  
26 environment at the young adult stage still showed an increased sensitivity to aldicarb  
27 compared with those in the hermaphrodite-conditioned medium (66.3% vs. 42.0% at 70  
28 minutes). The effect was comparable to that in hermaphrodites sustained in the male



1 environment (78.0% vs. 42.0%) (Fig. 2C), suggesting that the maintenance of the elevated  
2 cholinergic synaptic transmission rate at the hermaphrodites NMJ does not require a  
3 sustained male excretome environment in adults. In contrast, we observed that the  
4 hermaphrodite leaving the male-conditioned medium at the mid-L4 stage presented similar  
5 aldicarb sensitivity to those from the hermaphrodite-conditioned medium (37.7% vs. 42.0% at  
6 70 min) (Fig. 2C and Supplementary Fig. 2E). Taken together, these data support the notion  
7 that the male environment exposure at a critical period (the L3-L4 stage) is required for the  
8 modulation of hermaphrodites NMJ cholinergic synaptic transmission.

9         The aforementioned experiments were carried out using the Bristol N2 strain. To  
10 determine whether the male excretome environment's effect is conserved in other *C. elegans*  
11 strains, we studied several natural variations, including the Australian strain AB3, the Hawaiian  
12 strain CB4856, and the Madison strain TR389. We observed that the male-conditioned  
13 medium accelerated animal paralysis in the CB4856 (Fig. 2D, 59.7% vs. 20.7% after 60  
14 minutes of aldicarb) and the AB3 strains (Fig. 2E, 52.8% vs. 28.6% after 80 minutes of  
15 aldicarb), but not in the TR389 strain (Fig. 2F, 68.46% vs. 60.99% after 130 minutes of  
16 aldicarb). Thus, although the effect of the male environment does exist in other natural *C.*  
17 *elegans* strains, exceptions do exist, as in the TR389 strain.

18         Two possibilities could account for this lack of a modulator effect: TR389 males may  
19 not be able to secrete the modulator ascarosides; alternatively, TR389 hermaphrodites cannot  
20 sense and respond to the modulator ascarosides. To distinguish between these two  
21 possibilities, we grew Bristol N2 hermaphrodites in the TR389 male-conditioned medium and  
22 compared their synaptic transmission by aldicarb sensitivity with those maintained in N2 and  
23 TR389 hermaphrodite-conditioned medium. The three groups presented similar sensitivity to  
24 aldicarb (Fig. 2G). In contrast, TR389 hermaphrodites grown in the N2 male-conditioned  
25 medium showed significantly increased sensitivity to aldicarb compared to those in the N2  
26 hermaphrodite-conditioned medium (Supplementary Fig. 3). Thus, TR389 males appear  
27 unable to secrete the modulator ascarosides.

28

1 **The male excretome environment alters hermaphrodite locomotion and promotes**  
2 **mating efficiency**

3 As mentioned above, the coordination of excitatory and inhibitory innervations at NMJ  
4 guarantees *C. elegans* sinusoidal movement. To study whether the altered cholinergic  
5 synaptic transmission impacts body-bend amplitude and coordination of animal movement,  
6 we compared the locomotion of hermaphrodites from male- or hermaphrodite-conditioned  
7 medium. We observed that males had higher body curvature and locomotor velocity than  
8 hermaphrodites (Supplementary Fig. 4A-B), consistent with previous studies (Mowrey et al.,  
9 2014). We did not observe body-bend curvature differences in hermaphrodites from male- and  
10 hermaphrodite-conditioned medium (Supplementary Fig. 4C-D). However, the locomotor  
11 velocities of hermaphrodites from male-conditioned medium are significantly lower than those  
12 from hermaphrodite-conditioned medium (Fig. 2H). In contrast, the TR389 male-conditioned  
13 medium did not show similar effects (Fig. 2H). This supports the notion that the altered NMJ  
14 synaptic transmission by the male excretome affects hermaphrodite locomotion. It's possible  
15 that the disturbance of excitatory and inhibitory synaptic transmission balance at NMJ  
16 compromise locomotion activity.

17 Communications between conspecifics modulate behaviors and alter physiology to  
18 allow appropriate responses to particular social environments. To study the physiological  
19 significance of male excretome modulation, we tested its effect on hermaphrodite's egg-laying  
20 behaviors and mating abilities. We calculated the brood size of hermaphrodites from  
21 hermaphrodite- and male-conditioned medium, and observed no significant differences  
22 between the two groups (Supplementary Fig. 5). Then we measured the mating efficiency with  
23 males in hermaphrodites from male- and hermaphrodite-conditioned medium. The results  
24 showed that hermaphrodites from TR389 male-conditioned medium had higher mating  
25 efficiency compared to those from hermaphrodite-conditioned medium (Fig. 2I), which is  
26 consistent with previous research that the male environment reduces hermaphrodites  
27 exploration and increases mating behaviors (Aprison and Ruvinsky, 2019a, b). Interestingly,  
28 we found that N2 male-conditioned medium showed a significant further increase of

1 hermaphrodite mating efficiency than the TR389 male-conditioned medium (Fig. 2I). We  
2 speculate that the N2 males secrete additional metabolites to modulate locomotion and mating  
3 efficiency in hermaphrodites.

4

### 5 **Male-specific ascarosides mediate the modulatory effect of the male excretome** 6 **environment on the hermaphrodite NMJ synaptic transmission**

7 To identify the additional metabolites secreted by the N2 males, we focused on  
8 searching the male pheromones. In *C. elegans*, ascarosides are known to function as  
9 pheromones to mediate social interactions and modulate development (Butcher et al., 2007;  
10 Butcher et al., 2009; Ludewig et al., 2019; Ludewig and Schroeder, 2013; Srinivasan et al.,  
11 2008; Wu et al., 2019). We hypothesized that the observed effects of the male environment  
12 on hermaphrodite cholinergic synaptic transmission at the NMJ may be mediated by male-  
13 specific ascarosides. Ascarosides are derivatives of 3,6-dideoxysugar ascarylose, and their  
14 biosynthesis requires several dehydrogenases, including DAF-22, which  $\beta$ -oxidizes and  
15 shortens long-chain fatty acids to generate bioactive medium- and short-chain ascarosides  
16 (Fig. 3A) (Butcher et al., 2009; von Reuss et al., 2012; Zhou et al., 2018). Therefore, most of  
17 the active short- and medium-chain ascarosides are absent from the metabolomes of *daf-22*  
18 mutants (Butcher et al., 2009; von Reuss et al., 2012; Zhou et al., 2018).

19 To test if the effect of the male environment on hermaphrodite NMJ synaptic  
20 transmission is mediated by ascarosides, we grew hermaphrodites in *daf-22* conditioned  
21 medium and compared their aldicarb sensitivity to hermaphrodites grown in the wild type  
22 conditioned medium. We found that the hermaphrodites grown in the *daf-22* male-conditioned  
23 medium exhibited similar aldicarb sensitivity with those grown in *daf-22* hermaphrodite-  
24 conditioned medium (Fig. 3B, 43.7% vs. 43.7% at 70 minutes). The inability of the *daf-22* male  
25 environment to modulate hermaphrodite NMJ synaptic transmission suggests that male-  
26 specific ascarosides do contribute to the observed modulatory effects on synaptic  
27 transmission.

1           The pheromone effects are often sexually dimorphic. To study whether the male-  
2 specific ascarosides also modulate male NMJ synaptic transmission, we compared the  
3 aldicarb sensitivity of males grown in the hermaphrodite- and male-conditioned media. We did  
4 not observe aldicarb sensitivity differences in males from hermaphrodite- and male-  
5 conditioned medium (Supplementary Fig. 6A). Since males can secrete those modulatory  
6 pheromones themselves, we took advantage of *daf-22* mutant males that have the defects in  
7 pheromone production. We also found that *daf-22* males from the male-conditioned medium  
8 did not show any significant differences in aldicarb sensitivity compared to those from the  
9 hermaphrodite-conditioned medium (Fig. 3C). In contrast, the *daf-22* hermaphrodites showed  
10 higher aldicarb sensitivity from the male-conditioned medium compared to those from the  
11 hermaphrodite-conditioned medium (Supplementary Fig. 6B), suggesting *daf-22* mutation did  
12 not alter the modulatory effect of male-conditioned medium on hermaphrodites. These results  
13 indicate that male-specific ascarosides cannot modulate synaptic transmission in males,  
14 suggesting a sexually dimorphic effect of those male-specific ascarosides.

15           The *C. elegans* ascarosides comprise a complex mixture of ascaroside derivatives that  
16 vary according to their side-chains; there are saturated,  $\alpha,\beta$ -unsaturated (e.g.,  $\alpha,\beta$  double-  
17 bond), and  $\beta$ -hydroxylated (e.g.,  $\beta$ -hydroxylated side chain) derivatives. Hermaphrodites and  
18 males are known to accumulate distinct types and quantities of these various ascarosides  
19 (Butcher et al., 2009; von Reuss et al., 2012). To identify the “modulator ascarosides” that  
20 function in the observed modulation of the hermaphrodite NMJ synaptic transmission, we first  
21 analyzed the TR389 strain, which recalls appearing unable to secrete the modulator  
22 ascarosides.

23           To further determine the identity of the modulator ascarosides, we used Ultra  
24 Performance Liquid Chromatography-Mass Spectrometry (UPLC-MS) analyses to compare  
25 the excretomes among N2 hermaphrodite cultures (containing N2 hermaphrodites only), N2  
26 male cultures, *daf-22* male cultures, and TR389 male cultures (all of the male cultures contains  
27 around 35% males) (Fig. 3D). We collected and analyzed culture media samples with UPLC-

1 MS and found that *ascr#10* was enriched in both the N2 male and TR389 male cultures relative  
2 to the N2 hermaphrodite cultures (Supplementary Fig. 7A), consistent with previous reports  
3 (Izrayelit et al., 2012). We also observed that the *daf-22* male cultures lacked most of the  
4 short- and medium-chain ascarosides, and accumulated the long-chain ascarosides  
5 (Supplementary Fig. 7B), confirming the role of DAF-22 in dehydrogenating and shortening  
6 ascaroside side chains.

7 Next, reasoning that the modulator ascarosides should be enriched in N2 male-  
8 conditioned culture, we compared the UPLC-MS profiles of N2 male cultures with the N2  
9 hermaphrodites and the TR389 male cultures. The medium-chain  $\beta$ -hydroxylated ascarosides  
10 were substantially increased in the N2 male cultures compared to the N2 hermaphrodite  
11 cultures and TR389 male cultures. Specifically, the significantly enriched  $\beta$ -hydroxylated  
12 ascarosides in N2 males included C13, C14, and C15 ascarosides (Fig. 3E). Notably, we  
13 detected no significant changes between the N2 and TR389 male cultures for saturated  
14 ascarosides (Supplementary Fig. 7C). These results implicate that the medium-chain  $\beta$ -  
15 hydroxylated ascarosides may act as the male modulator ascarosides.

16 Pursuing this with a genetic approach, we acquired a mutant of the known ascaroside  
17 synthesis enzyme DHS-28; previous analysis of the *dhs-28* mutant hermaphrodite  
18 metabolome has shown that these animals accumulate  $\beta$ -hydroxylated medium-chain  
19 ascarosides (Butcher et al., 2009; von Reuss et al., 2012). We conducted aldicarb assays to  
20 compare the E/I ratios of *dhs-28* cultures with those of N2 hermaphrodites grown in the  
21 hermaphrodite-conditioned medium. As expected, *dhs-28* mutant hermaphrodites were more  
22 sensitive to aldicarb compared with N2 hermaphrodites (Fig. 3F). We also tested  
23 hermaphrodites of other known ascaroside synthesis mutants, including *maoc-1* and *acox-*  
24 *1.1*—which are known to accumulate saturated and  $\alpha,\beta$ -unsaturated side-chain ascarosides—  
25 but found that *maoc-1* mutants present slightly increase of aldicarb sensitivity than the wild  
26 type, and *acox-1.1* mutants were indifferent from the wild type for their sensitivity to aldicarb  
27 (Fig. 3F). Furthermore, we examined the male ascaroside effects on *dhs-28* mutants, which

1 could accumulate  $\beta$ -hydroxylated medium-chain ascarosides themselves. The result showed  
2 that *dhs-28* hermaphrodites cannot be modulated by male ascarosides by presenting  
3 comparable aldicarb sensitivity when in hermaphrodite- and male-conditioned medium (Fig.  
4 3G). These experiments with ascaroside biosynthesis mutants establish that environmental  
5 enrichment of  $\beta$ -hydroxylated medium-chain ascarosides increases the hermaphrodite NMJ  
6 E/I ratio, thereby supporting that these specific ascarosides may function as NMJ cholinergic  
7 synaptic transmission modulators.

8

### 9 **AWB sensory neurons are involved in sensing the modulator ascarosides and transmit** 10 **signals to the NMJ through cGMP signaling**

11 Pheromone signals in the environment are detected and integrated by chemosensory  
12 neural circuits (Ludewig and Schroeder, 2013; Srinivasan et al., 2008). In *C. elegans*, there  
13 are 11 pairs of chemosensory neurons that can respond to pheromone signals (ASE, AWC,  
14 AWA, AWB, ASH, ASI, ADF, ASG, ASJ, ASK, and ADL). To identify the specific  
15 chemosensory neurons sensing the modulator ascarosides, we used a miniSOG (mini Singlet  
16 Oxygen Generator)-induced genetic ablation strategy. miniSOG is an engineered fluorescent  
17 protein that can generate singlet oxygen upon blue light illumination. Targeting miniSOG to  
18 mitochondria can lead to singlet oxygen accumulation in mitochondria, which induces rapid  
19 and efficient cell death (Qi et al., 2012). To examine the genetic ablation efficiency, we co-  
20 expressed mCherry and miniSOG in the chemosensory neurons under the control of the *flp-*  
21 *21* promoter and quantified the miniSOG ablation efficiency based on the percentage of live  
22 neurons labeled by mCherry before and after induction of cell death. To optimize the ablation  
23 protocol, we tested continuous blue light stimulation at a power of 57 mW/cm<sup>2</sup> over different  
24 periods (Supplementary Fig. 8A). We found that 15 minutes' stimulation resulted in complete  
25 loss of mCherry signals in around 47.8% of neurons and a dramatic reduction of mCherry  
26 signals in 26.1% of neurons, whereas stimulation for 30 minutes or 50 minutes led to complete  
27 loss of mCherry signals in almost 80% of neurons and faint residual expression of mCherry

1 signals in 20% of neurons (Supplementary Fig. 8B-C). Considering both the ablation efficiency  
2 and the stimulation time, we chose 30 minutes of continuous blue light stimulation for our  
3 standard ablation procedure.

4 We screened all the 11 pairs of chemosensory neurons based on miniSOG-induced  
5 genetic ablation of hermaphrodites at the late L1 stage (Fig. 4A). We grew hermaphrodites in  
6 male-conditioned or hermaphrodite-conditioned medium following ablation of each specific  
7 chemosensory neuron type, and measured their sensitivity to aldicarb. Ablation of the AWB  
8 (*str-1* promoter driving miniSOG) neuron pair in hermaphrodites blocked the increased  
9 sensitivity to aldicarb following exposure to the male-conditioned medium (Fig. 4B-C, 45.6%  
10 vs. 43.4% at 80 minutes). In contrast, the increased aldicarb sensitivity in the male-conditioned  
11 medium remained when any other chemosensory neurons were ablated (Fig. 4A and  
12 Supplementary Fig. 9A-G). To further confirm the requirement of AWB in sensing the  
13 modulator ascarosides, we compared the locomotion of AWB-ablated hermaphrodites from  
14 male- and hermaphrodite-conditioned medium. Our data showed that AWB neurons ablation  
15 blocked the decreased velocity by the modulator ascarosides (Fig. 4D). These results support  
16 that AWB neurons in hermaphrodites are necessary for the effects of male-specific modulator  
17 ascarosides on NMJ synaptic transmission.

18 We also tested whether activation of AWB neurons is sufficient to modulate NMJ  
19 synaptic transmission. We specifically expressed the channelrhodopsin variant CHIEF in AWB  
20 neurons, and administered blue light illumination in the presence of all-trans retinal (ATR) to  
21 activate AWB neurons throughout the L4 stage. Hermaphrodites with activated AWB neurons  
22 during the L4 stage showed higher sensitivity to aldicarb than controls without blue light  
23 activation (Fig. 4E). This effect is absent in control groups lacking ATR (Fig. 4E). In contrast,  
24 activation of ASJ/ASI neurons or other amphid wing neurons like AWA and AWC cannot  
25 increase aldicarb sensitivity, and the hermaphrodites with AWA neurons activation even  
26 present slightly decreased aldicarb sensitivity (Supplementary Fig. 10A-C). These findings

1 confirm that activation of the AWB chemosensory neuron pair in hermaphrodites is sufficient  
2 to modulate the NMJ synaptic transmission.

3 In order to test whether AWB neurons directly sense those modulator ascarosides, we  
4 monitored intracellular  $Ca^{2+}$  dynamics upon male excretomes stimulation by expressing the  
5 calcium indicator GCaMP6f in AWB neurons. We found that the AWB neurons elicited a rapid  
6 and robust calcium transient responding to the male excretomes. However, no responses  
7 were detected by stimulation with the hermaphrodite excretomes (Fig. 4F-H). Collectively, the  
8 data support that AWB neurons directly respond to the male-specific modulator ascarosides.

9 We next explored which signaling molecules in AWB neurons mediate their  
10 responsivity to the modulator ascarosides. In *C. elegans*, most chemical odors are perceived  
11 upon their binding to specific G-protein coupled receptors (GPCRs) located in chemosensory  
12 neurons; these receptors subsequently activate downstream signaling cascades (Bargmann,  
13 2006; Li and Liberles, 2015; Liberles, 2014). The G protein ODR-3 and the cGMP-gated  
14 channels TAX-2 have been implicated in chemosensory signal transduction in AWB neurons.  
15 We first examined the NMJ E/I ratio in *tax-2* and *odr-3* mutant hermaphrodites. We observed  
16 no differences in sensitivity to aldicarb for *tax-2* mutant hermaphrodites upon exposure to the  
17 male-conditioned or hermaphrodite-conditioned media (Fig. 4I). In the *odr-3* mutants, we even  
18 observed a decreased aldicarb sensitivity in hermaphrodites from male-conditioned medium  
19 (Fig. 4J), suggesting that the ability to mediate the downstream signaling effects of modulator  
20 ascarosides and increase NMJ E/I ratio is disrupted in these mutants (Fig. 4I, 4J). Further  
21 supporting this, complementing TAX-2 expression in AWB neurons rescued the increased  
22 aldicarb sensitivity phenotype of hermaphrodites grown in the male-conditioned medium (Fig.  
23 4I). Expression of TAX-2 in ASI and ASJ neurons had no such rescue effect (Fig. 4I). The  
24 increased sensitivity to aldicarb was also rescued by ODR-3 complementation in AWB  
25 neurons (Fig. 4J). Together, these results establish that the cGMP signaling pathway in AWB  
26 chemosensory neurons transmits male-specific modulator ascaroside signals to the NMJ.

27



## 1 **Excitatory postsynaptic receptor clustering is increased in hermaphrodites exposed to** 2 **the male environment**

3       The steps of the synaptic transmission process include presynaptic vesicle fusion,  
4 neurotransmission, and neurotransmitter binding to postsynaptic receptors. The increased  
5 cholinergic synaptic transmission rate at the hermaphrodite NMJ induced by the modulator  
6 ascarosides could reflect changes in any of these steps. We first examined whether any NMJ  
7 synaptic structures were altered, specifically by labeling cholinergic synapses via expression  
8 of a RAB-3-GFP fusion protein in DA and DB cholinergic motor neurons (using the *unc-129*  
9 promoter) (Colavita et al., 1998). DA and DB neurons are known to receive synaptic inputs in  
10 the ventral nerve cord and to form NMJs with the body-wall muscle in the dorsal nerve cord,  
11 and this results in the formation of puncta comprising presynaptic RAB-3 proteins that can be  
12 observed at DA/DB axon terminals in the dorsal cord (Colavita et al., 1998). We observed that  
13 puncta fluorescence intensities and densities were comparable in hermaphrodites grown in  
14 either hermaphrodite- or male-conditioned medium (Fig. 5A), which suggested that the  
15 excitatory synapse structures were unaltered by the presence of modulator ascarosides. We  
16 next labeled the GABAergic motor neuron terminals by expressing RAB-3 fused with RFP  
17 under the *unc-25* promoter (Jin et al., 1999). Similar to the excitatory cholinergic synapses,  
18 the puncta fluorescence intensities and densities in the inhibitory GABAergic synapses did not  
19 differ between hermaphrodites from male-conditioned or hermaphrodite-conditioned medium  
20 (Fig. 5B), which collectively suggest that neither excitatory nor inhibitory synapse structures  
21 are affected by the modulator ascarosides.

22       We then examined the extent of excitatory and inhibitory postsynaptic receptor  
23 localization in hermaphrodites by analyzing the subcellular distributions of nicotinic  
24 acetylcholine receptors (nAChRs; excitatory) and GABA<sub>A</sub> receptors (inhibitory). A single-copy  
25 transgenic insertion technique was applied to express fluorescence reporter fusion variants of  
26 two known nAChR subunit proteins (UNC-29-RFP and ACR-16-RFP) or a GABA<sub>A</sub> receptor  
27 subunit (UNC-49-mCherry) under the control of a muscle-specific promoter. At cholinergic  
28 synapses, the hermaphrodites from the male-conditioned medium had a slight but significant

1 increase in puncta signal intensities for the nAChRs compared to those from the  
2 hermaphrodite-conditioned medium (Fig. 5C-D). However, the GABA<sub>A</sub>R intensities were not  
3 changed (Fig. 5E). Both the nAChRs and GABA<sub>A</sub>R densities were unaltered (Fig. 5C-E). Thus,  
4 the male-specific modulator ascarosides are involved in increased postsynaptic receptor  
5 abundance at excitatory synapses in hermaphrodites.

6

### 7 **Presynaptic CaV2 calcium channel localization at NMJ cholinergic synapses is** 8 **increased in hermaphrodites exposed to the male environment**

9       Next, we examined if the process of presynaptic neurotransmission is regulated based  
10 on the fact that the mEPSC frequency was increased in hermaphrodites by the male-specific  
11 pheromones (Fig. 1H-J). N-type voltage-gated calcium channels (CaV2) are required for the  
12 presynaptic calcium influx process that underlies both excitatory and inhibitory  
13 neurotransmission (Liu et al., 2018; Tong et al., 2017). Therefore, we inspected CaV2 calcium  
14 channel localization and abundance at presynaptic elements in hermaphrodites grown in  
15 either hermaphrodite- or male-conditioned medium. To visualize endogenous CaV2 at  
16 excitatory or inhibitory synapses separately, we utilized the split GFP complementary system  
17 (Cabantous et al., 2005; Kamiyama et al., 2016). In *C. elegans*, UNC-2 encodes the CaV2  
18 calcium channel  $\alpha$  subunit, and we used CRISPR/Cas9 system to insert a sequence coding  
19 for seven GFP11 fragments at the C-terminus of UNC-2/CaV2. In parallel, the GFP 1-10  
20 fragment was constitutively expressed in DA and DB cholinergic motor neurons under the  
21 control of the *unc-129* promoter or in the GABAergic motor neurons under the control of the  
22 *unc-47* promoter (Fig. 6A). In this way, we were able to monitor the endogenous localization  
23 of CaV2 channels at excitatory and inhibitory synapses. To validate the correct subcellular  
24 localization, we coexpressed the presynaptic marker UNC-57/Endophilin fused with mCherry.  
25 The CaV2-GFP fusion protein formed fluorescent puncta largely co-localized with UNC-  
26 57/Endophilin in dorsal cord axons (Fig. 6B-C, Pearson correlation coefficient  $0.7808 \pm 0.022$   
27 for DA/DB cholinergic motor terminals, and  $0.7880 \pm 0.0175$  for GABAergic motor neuron

1 terminals), confirming that CaV2-splitGFP is localized correctly at presynaptic elements. We  
2 further found that UNC-57/Endophilin fluorescence intensities and densities were  
3 indistinguishable in hermaphrodites from the hermaphrodite- and male-conditioned medium  
4 (Supplementary Fig. 11). This result is consistent with RAB-3-GFP imaging results, and  
5 support that the presynaptic structure is not altered by male pheromone (Fig. 5A-B).

6 Comparison of the CaV2 puncta fluorescence intensities revealed a significant  
7 increase at cholinergic synapses of hermaphrodites from male-conditioned medium compared  
8 to those from the hermaphrodite-conditioned medium (Fig. 6D). A slight but notable increase  
9 in densities was also observed (Fig. 6D). In contrast, we detected no significant differences in  
10 CaV2 puncta fluorescence intensities and densities at GABAergic synapses (Fig. 6E).

11 To further confirm that CaV2 is the synaptic target of modulator ascarosides, we  
12 compared the cholinergic synaptic transmission and locomotion velocity in *unc-2*  
13 hermaphrodites from male- and hermaphrodite-conditioned medium. The mEPSC rate and  
14 locomotion velocity in the *unc-2* mutant were decreased compared to those in the wild type  
15 (Fig. 7A-B), which is correlated with the requirement of CaV2 in mediating presynaptic  
16 transmission. Furthermore, we found that the male-specific ascarosides no longer increase  
17 mEPSC rates in the *unc-2* hermaphrodites (Fig. 7A-C). Similarly, the locomotion velocity was  
18 not changed in *unc-2* hermaphrodites from male-condition medium compared to those from  
19 hermaphrodite-condition medium (Fig. 7D), which suggests that *unc-2* mutation blocks the  
20 effects of the male-specific modulator ascarosides on NMJ synaptic transmission. These  
21 findings collectively indicate that the male-specific modulator ascarosides may promote the  
22 accumulation of CaV2 calcium channels at excitatory cholinergic synapses, accounting for the  
23 potentiated cholinergic synaptic transmission at NMJ.

24

## 25 **DISCUSSION**

26 In this study, we have revealed a novel mechanism through which the male environment  
27 modulates the NMJ synaptic transmission, locomotion behavior, and mating efficiency in  
28 hermaphrodites. We show that the male environment effects are mediated based on exposure

1 to male-specific pheromones at a specific developmental stage in hermaphrodites (the entire  
2 L3-L4 stage). We further demonstrate that hermaphrodite sense and process these male-  
3 specific pheromones by AWB chemosensory neurons using the cGMP signaling. At the  
4 hermaphrodite NMJ, presynaptic calcium channel localization and postsynaptic acetylcholine  
5 receptor clustering are elevated by exposure to male-specific pheromones, resulting in an  
6 increased cholinergic synaptic transmission. Our results provide mechanistic details of how  
7 environmental factors alter neuronal development and physiology, presenting insights to  
8 better understand the associations between dysregulated neurodevelopment and various  
9 psychiatric diseases.

10

### 11 ***C. elegans* NMJ as a model to study synaptogenesis**

12 Here, we used the *C. elegans* NMJ as a model to study synaptic transmission, and our  
13 work underscore *C. elegans* as a useful model to study synaptic transmission *in vivo*. The  
14 motor circuit of *C. elegans* relies on a precise balance between cholinergic excitation and  
15 GABAergic inhibition of body-wall muscles to generates precise locomotion activities  
16 (Richmond and Jorgensen, 1999). Both our and others' studies have identified mechanisms  
17 of synaptogenesis and synaptic transmission that are shared by the *C. elegans* NMJ and the  
18 mammalian central nervous system (Dolphin and Lee, 2020; Hata et al., 1993; Ogawa et al.,  
19 1998; Pevsner et al., 1994; Richmond et al., 1999; Rizo and Sudhof, 2012). In the worm motor  
20 circuit and the mammalian brain, acetylcholine is an excitatory neurotransmitter while GABA  
21 is an inhibitory neurotransmitter. Moreover, the clustering of acetylcholine receptors and  
22 GABA receptors at synapses is observed in *C. elegans* and vertebrates (Maro et al., 2015;  
23 Pouloupoulos et al., 2009; Tong et al., 2015; Tu et al., 2015).

24 It is also highly notable that many autism-linked synaptic proteins, including  
25 Neuroligins and Neurexins, have been shown to function with conserved roles in NMJ  
26 synaptogenesis and synaptic transmission (Hart and Hobert, 2018; Hu et al., 2012; Kurshan  
27 et al., 2018; Philbrook et al., 2018; Tong et al., 2017): Neuroligins and Neurexins form trans-  
28 synaptic complex and regulate synaptic transmission in both mammalian central nervous

1 system and *C. elegans* NMJ (Hu et al., 2012; Kurshan et al., 2018; Tong et al., 2017).  
2 Neuroligins are required for postsynaptic GABA<sub>A</sub>-receptor clustering and inhibitory synaptic  
3 transmission (Maro et al., 2015; Pouloupoulos et al., 2009; Tong et al., 2015; Tu et al., 2015).  
4 While Neurexins undergo ectodomain shedding by ADAM10 protease (Borcel et al., 2016;  
5 Tong et al., 2015), bind to presynaptic CaV2 calcium channel  $\alpha 2\delta$  subunits, and regulate  
6 calcium channel activity (Luo et al., 2020; Tong et al., 2017). Thus, the mechanisms we  
7 identified here in the *C. elegans* NMJ may provide new insights into how synaptic transmission  
8 is maintained in the mammalian brain.

9

## 10 **Sexual dimorphic modulation on NMJ synaptic transmission**

11 We show that a previously unknown circuit comprised of AWB chemosensory neurons  
12 regulates NMJ synaptic transmission in *C. elegans*. Interestingly, the male-enriched  
13 pheromones increase the acetylcholine transmission specifically in hermaphrodites but not in  
14 males, suggesting sexual dimorphism in the regulation of NMJ synaptic transmission. This  
15 could be mediated by sex-specific neuronal circuits that are composed of either sex-specific  
16 or sex-shared neurons to process and transmit male pheromone signals to NMJ. A *C. elegans*  
17 male has 385 neurons, whereas a hermaphrodite has 302 neurons. The majority of male-  
18 specific neurons are localized in the male tail and are involved in the complex mating  
19 behaviors. There are several hermaphrodite-specific neurons in the nervous system,  
20 including VC and HSN motor neurons, which are mainly required for reproductive functions  
21 (Banerjee and Hallem, 2018; Emmons, 2018; Garcia and Portman, 2016). On the other hand,  
22 several sex-shared neurons, including motor neurons, AWA, AWC, and ASK chemosensory  
23 neurons, DVA mechanosensory neurons, as well as AVA interneurons, could contribute to  
24 sex-specific neural circuits by mediating attraction and aversion behaviors (Banerjee and  
25 Hallem, 2018; Bayer and Hobert, 2018; Cook et al., 2019; Fagan et al., 2018; Mowrey et al.,  
26 2014; Narayan et al., 2016; Wan et al., 2019). Our results identified that AWB chemosensory  
27 neurons mediate a sexually dimorphic modulation of NMJ synaptic transmission. Further

1 studies will be required to unravel the downstream neural circuits, including interneurons and  
2 premotor neurons, that function to process the modulator ascaroside signals to modulate NMJ  
3 synaptic transmission. Another possibility for this sexual dimorphic modulation is from sexually  
4 dimorphic hormone signaling pathways, such as vasopressin/oxytocin and their receptors  
5 (Garrison, 2012).

6 Our data show that pheromones modulating hermaphrodite NMJ synaptic transmission  
7 are enriched in N2 males. Previous studies have reported various male-specific ascarosides,  
8 including *ascr#10* and indole containing ascarosides (IC-ascarosides, especially *icas#3* and  
9 *icas#9*). However, our data indicate that *ascr#10* and indole IC-ascarosides are unlikely the  
10 modulator ascarosides. First, *ascr#10* levels are comparable in N2 and TR389 males. Second,  
11 previous work has established that ASI and ASK sensory neurons are required for  
12 hermaphrodites to sense *ascr#10* and IC-ascarosides (Aprison and Ruvinsky, 2017; Dong et  
13 al., 2016), whereas we find that ASI and ASK neurons are dispensable for hermaphrodites to  
14 sense the modulator ascarosides. In contrast, our UPLC-MS data strongly suggest that the  
15 medium-chain  $\beta$ -hydroxylated ascarosides (C13, C14, and C15) may mediate this effect.  
16 Although we provided extensive genetic evidence, we have not experimentally confirmed that  
17 these specific ascarosides are sufficient to modulate hermaphrodite NMJ synaptic  
18 transmission.

19 Previous studies by Brunet and Murphy labs have shown that male pheromone  
20 exposure affects animal health and shortens hermaphrodite life span (Maures et al., 2014; Shi  
21 and Murphy, 2014; Shi et al., 2017). Here our data suggest that it might be different  
22 mechanisms to modulate longevity and NMJ synaptic transmission. In previous research, they  
23 found that exposure of hermaphrodite to male pheromones at the beginning of their life (day  
24 1) or sexual maturity (day 4) had a similar effect on hermaphrodites' life span. However, we  
25 showed that L3-L4 is a critical developmental stage for modulation of hermaphrodite NMJ  
26 synaptic transmission by male pheromones (Fig. 2A-C). Distinct male-specific pheromones

1 may mediate the effects on longevity and NMJ. Further studies should be carried out to identify  
2 the specific ascaroside pheromones in males.

3 Our work demonstrates that early pheromone environment exposure has a long-term  
4 effect on synaptic transmission. We suspect that the observed effects may be mediated  
5 through endocrine signaling pathways, such as DAF-7/TGF- $\beta$  and DAF-2/insulin, which are  
6 known to drive both epigenomic and transcriptional changes. In this light, recent studies have  
7 shown how pheromone exposure can inhibit learning behavior by disrupting the balance  
8 between two insulin-like peptides, ins-16 and ins-4 (Wu et al., 2019). Further studies are  
9 required to characterize whether endocrine system components like insulin signaling  
10 molecules are involved in regulating synaptic transmission in response to male-specific  
11 ascarosides.

12

### 13 **Presynaptic calcium channels as neuromodulation targets**

14 Our results show that modulator pheromones regulate hermaphrodite NMJ cholinergic  
15 transmission by altering the presynaptic localization of calcium channel CaV2 at cholinergic  
16 synapses. These results support that CaV2 calcium channels can be viewed as potential  
17 targets for environmental modulation of the synaptic transmission. At synapses, CaV2  
18 channels are known to form large signaling complexes in the presynaptic nerve terminal that  
19 are responsible for calcium influx and neurotransmitter release (Dolphin and Lee, 2020).  
20 Numerous studies have verified causal relationships for calcium channel mutations and  
21 polymorphisms in neuropsychiatric diseases, including ASD (Nanou and Catterall, 2018;  
22 Zamponi, 2016). Our previous studies identified a synaptic retrograde signal mediated by  
23 autism-linked proteins that regulate CaV2 presynaptic localization to alter excitatory synaptic  
24 transmission (Tong et al., 2017). Here, we present the important evidence that the presynaptic  
25 calcium channel CaV2 could also be a target of social interaction modulation to shift the  
26 synaptic excitation and inhibition balance. These results support the idea that changes in  
27 presynaptic calcium channel localization could be impactful in some forms of ASD.

1           How might changes in chemosensory neuron activity contribute to presynaptic calcium  
2 channel localization? Our results suggest that it is not a general change of CaV2 expression  
3 levels, because we observed increased presynaptic localization at cholinergic synapses but  
4 not at GABAergic synapses. We suspect that the specific synaptic recruitment of CaV2 is  
5 somehow potentiated by the modulator ascarosides. Previous studies have suggested that  
6 protein interactions are required for cell-surface localization of calcium channels as well as  
7 their docking at the active zone. It is therefore possible that pre-synapse specific proteins that  
8 are only present at cholinergic synapses may act downstream of the chemosensory circuits  
9 to regulate the surface localization of CaV2 channels.

10           Collectively, our findings reveal a novel mechanism through which pheromones in the  
11 environment modulate synaptogenesis and synaptic transmission in the nervous system.  
12 Beyond suggesting that calcium channels may be a shared target for both genetic and  
13 environmental modulation during development, our study lays a foundation for studies into the  
14 signaling and cell-specific functions underlying neurodevelopmental dysfunction.

15

## 16 **AUTHOR CONTRIBUTIONS**

17 K-Y.Q., W-X.Z., Y.H., X-T.Z., H.L., L.L., L.C., F-M.T., C.C., Q.H., and C-X.S. designed,  
18 performed, and analyzed the experiments. K-Y.Q., W-X.Z. Y.H., X-T.Z., F-M.T., and C-X.S.  
19 performed the aldicarb experiments, fluorescent imaging, calcium imaging, locomotion  
20 analysis, and mating behaviors. H.L. and L.L. performed electrophysiological recordings. L.C.  
21 performed the calcium imaging in AWB neurons, C.C. and Q.H. constructed the UNC-2  
22 imaging strains. S. G., J.K., Z.H., Q.L., and X-J.T. supervised the experimental design and  
23 data interpretation. K-Y.Q., Q.L., and X-J.T. wrote the manuscript. All authors discussed the  
24 results and commented on the manuscript.

25

## 26 **ACKNOWLEDGEMENTS**

27 We thank the *C. elegans* Genetics Stock Center, National BioResource Project (NBRP), Jean-  
28 Louis Bessereau, Yingchuan Billy Qi, and Quan Wen for sharing strains and reagents. We



1 also thank the Molecular Imaging Core Facility (MICF), Biological Mass Spectrometry Core  
 2 Facility (BMSCF) at School of Life Science and Technology, ShanghaiTech University for help  
 3 in calcium imaging and mass spectrometric analysis. This work was supported by the Basic  
 4 Research Project from the Science and Technology Commission of Shanghai Municipality  
 5 (19JC1414100 to X-J.T.), Shanghai Pujiang Program (18PJ1407600 to X-J.T. and  
 6 17PJ1405400 to Q.L.), Shanghai Brain-Intelligence Project from the Science and Technology  
 7 Commission of Shanghai Municipality (18JC1420302), Program for Special Appointment at  
 8 Shanghai Institutions of Higher Learning (QD2018017 to Q.L.), Innovative research team of  
 9 high-level local universities in Shanghai, National Institute of Neurological Disorder and Stroke  
 10 (NS32196 to J.M.K.), National Institutes of Health research grant (NEI 1R21EY029450-01 to  
 11 J.L. and Z.H.), and National Health and Medical Research Council (APP1122351 to Z.H.).

12

### 13 STAR METHODS

#### 14 KEY RESOURCES TABLE

15

| REAGENT OR RESOURCE                       | SOURCE              | IDENTIFIER      |
|-------------------------------------------|---------------------|-----------------|
| Chemicals                                 |                     |                 |
| Aldicarb                                  | ApexBio             | Cat#: B4778     |
| All-trans-Retinal                         | Sigma               | Cat#: R2500     |
| Geneticin, G418 Sulfate                   | GOLDBIO             | Cat#: G-418-1   |
| 2,3-Butanedione monoxime                  | Sigma               | Cat#: B0753     |
| Polybead® Microspheres 0.10 µm            | Polysciences        | Cat#: 00876-15  |
| Fluospheres carboxylat                    | Life Science        | Cat#: F8813     |
| Critical Commercial Assays                |                     |                 |
| PureLink® HiPure Plasmid Miniprep Kit     | Invitrogen          | Cat#: K210002   |
| QIAprep Spin Miniprep Kit                 | Qiagen              | Cat#: 27106     |
| PrimeSTAAR Max DNA Polymerase             | Takara              | Cat#: R045A     |
| hyPerFusion™ high-fidelity DNA polymerase | ApexBio             | Cat#: K1032     |
| Gibson Assembly® Master Mix               | New England Biolabs | Cat#: E2611L    |
| Hieff CLONE™ Plus One Step Cloning Kit    | Yeasen              | Cat#: 10911ES62 |
| Experimental Models: Organisms/Strains    |                     |                 |
| <i>C.elegans</i>                          | CGC                 | N2(Bristol)     |
| <i>C.elegans</i>                          | CGC                 | AB3             |
| <i>C.elegans</i>                          | CGC                 | TR389           |
| <i>C.elegans</i>                          | CGC                 | CB4856          |
| <i>C.elegans: him-5(ok1896) V</i>         | CGC                 | RB1562          |

|                                                                                         |                    |         |
|-----------------------------------------------------------------------------------------|--------------------|---------|
| <i>C.elegans: tax-2(p691) I</i>                                                         | CGC                | PR691   |
| <i>C.elegans: odr-3(n1605) V</i>                                                        | CGC                | CX3222  |
| <i>C.elegans: acox-1.1(ok2257) I</i>                                                    | CGC                | VC1785  |
| <i>C.elegans: maoc-1(hj13) II</i>                                                       | CGC                | VS18    |
| <i>C.elegans: dhs-28(tm2581) X</i>                                                      | NBRP               | TM2581  |
| <i>C.elegans: daf-22(ok693) II</i>                                                      | CGC                | RB859   |
| <i>C.elegans: daf-22(ok693); him-5(ok1896)</i>                                          | In this study      | TXJ0938 |
| <i>C.elegans: unc-2(gk366) X</i>                                                        | CGC                | VC854   |
| <i>C.elegans: TR389;him-5 (xj001)V</i>                                                  | In this study      | TXJ0819 |
| <i>C.elegans: tax-2(691) I; xjEx0036[Pstr-1::tax-2 + Plin-44::GFP]</i>                  | In this study      | TXJ0583 |
| <i>C.elegans: tax-2(691) I; xjEx0038[Pdaf-28::tax-2 + Plin-44::GFP]</i>                 | In this study      | TXJ0611 |
| <i>C.elegans: odr-3(n1605) V; xjEx0052[Pstr-1::odr-3 + Plin-44::GFP]</i>                | In this study      | TXJ0616 |
| <i>C.elegans: xjEx0005[Pflp-21::tomm-20N-miniSOG + Pflp-21::mCherry + Pmyo-2::eGFP]</i> | In this study      | TXJ0595 |
| <i>C.elegans: xjEx0011[Pceh-36::tomm-20N-miniSOG + Pmyo-3::mCherry]</i>                 | In this study      | TXJ0620 |
| <i>C.elegans: xjEx0033[Pdaf-28::tomm-20N-miniSOG + Pdaf-28::mCherry + Pmyo-2::eGFP]</i> | In this study      | TXJ0581 |
| <i>C.elegans: xjEx0012[Pstr-1::tomm-20N-miniSOG + Pstr-1::mCherry + Pmyo-2::eGFP]</i>   | In this study      | TXJ0621 |
| <i>C.elegans: xjEx0016[Psra-7::tomm-20N-miniSOG + Psra-7::mCherry + Pmyo-2::eGFP]</i>   | In this study      | TXJ0577 |
| <i>C.elegans: xjEx0004[Pgpa-4::tomm-20N-miniSOG + Pgpa-4::mCherry + Pmyo-2::eGFP]</i>   | In this study      | TXJ0622 |
| <i>C.elegans: xjEx0021[Psrb-6::tomm-20N-miniSOG + Psrb-6::mCherry + Plin-44::GFP]</i>   | In this study      | TXJ0588 |
| <i>C.elegans: xjEx0023[Pgcy-15::tomm-20N-miniSOG + Pgcy-15::mCherry + Plin-44::GFP]</i> | In this study      | TXJ0591 |
| <i>C.elegans: xjEx0056[Podr-10::tomm-20N-miniSOG + Podr-10::mCherry + Plin-44::GFP]</i> | In this study      | TXJ0629 |
| <i>C.elegans: xjSi0004[Pdaf-28::oCHIEF::mCherry]</i>                                    | In this study      | TXJ0566 |
| <i>C.elegans: xjSi0005[Pstr-1::oCHIEF::mCherry]</i>                                     | In this study      | TXJ0567 |
| <i>C.elegans: xjSi0007[Pstr-2::oCHIEF::mCherry]</i>                                     | In this study      | TXJ0761 |
| <i>C.elegans: xjSi0008[Podr-10::oCHIEF::mCherry]</i>                                    | In this study      | TXJ0775 |
| <i>C.elegans: xjEx0058[Pstr-1::GCaMP6f + Pstr-1::mCherry + Plin-44::GFP]</i>            | In this study      | TXJ1052 |
| <i>C.elegans: xjlx0004[Pacr-5::ChrimsonN::mCherry] ; ljs131[Pmyo-3::GCaMP3]</i>         | In this study      | TXJ0630 |
| <i>C.elegans: ljs131[Pmyo-3::GCaMP3::tagRFP]</i>                                        | Shangbang Gao      | ZM7982  |
| <i>C.elegans: nuls283[Pmyo-3::unc-49::GFP; Punc-25:: RFP::rab-3]</i>                    | Joshua Kaplan      | KP5931  |
| <i>C.elegans: nuls431[Punc-129::GFP::rab-3]</i>                                         | Joshua Kaplan      | KP6221  |
| <i>C.elegans: xjSI0002[Pmyo-3::acr-16::RFP]</i>                                         | In this study      | TXJ0502 |
| <i>C.elegans: kr208[Punc-29::unc-29::tagRFP]</i>                                        | Jean-Louis Bassere | kr208   |

|                                                                                                                                               |                                |             |
|-----------------------------------------------------------------------------------------------------------------------------------------------|--------------------------------|-------------|
| <i>C.elegans</i> : <i>unc-49(e407)</i> ; <i>krSi2</i> [ <i>Punc-49::unc-49B::RFP</i> ]                                                        | Jean-Louis Bessereau           | EN2630 LGII |
| <i>C.elegans</i> : <i>nu586</i> [ <i>unc-2::GFP11x7</i> ]; <i>nuSi250</i> <i>Punc-129::splitGFP1-10::sl2::unc57-mCherry::sl2::mTagBFP2</i> ]  | Joshua Kaplan                  | KP9809      |
| <i>C.elegans</i> : <i>nu586</i> [ <i>unc-2::GFP11x7</i> ]; <i>nuSi251</i> [ <i>Punc-47::splitGFP1-10::sl2::unc57-mCherry::sl2::mTagBFP2</i> ] | Joshua Kaplan                  | KP9639      |
|                                                                                                                                               |                                |             |
| Plasmids                                                                                                                                      |                                |             |
| Plasmid: <i>pPD49.26</i> (A. Fire)                                                                                                            |                                |             |
| Plasmid: <i>pPD95.75</i> (A. Fire)                                                                                                            |                                |             |
| Plasmid: <i>pCFJ910</i>                                                                                                                       | Erik Jorgensen                 |             |
| Plasmid: <i>Punc-17β::tom-20N::miniSOG</i>                                                                                                    | Yingchuan B. Qi                | CZ14527     |
| Plasmid: <i>Pacr-5::chromson</i>                                                                                                              | Quan Wen                       | quan0071    |
| Plasmid: <i>GCaMP6f</i>                                                                                                                       | Shangbang Gao                  | pSG368      |
|                                                                                                                                               |                                |             |
| Cloning Primers                                                                                                                               |                                |             |
| <i>Pceh-36</i> F                                                                                                                              | tagaactcccgagaatgccaac         |             |
| <i>Pceh-36</i> R                                                                                                                              | tgtgcatgccccgaggcgaagtgtct     |             |
| <i>Podr-10</i> F                                                                                                                              | tgactcataaatcaataccagtctg      |             |
| <i>Podr-10</i> R                                                                                                                              | ggagctgtaaggtatcttaa           |             |
| <i>Pstr-1</i> F                                                                                                                               | agaaccactacacttgaacgatacga     |             |
| <i>Pstr-1</i> R                                                                                                                               | tagtcaaatgatatgaagttgtgtaaga   |             |
| <i>Psrb-6</i> F                                                                                                                               | tctactttaaatattatcttctc        |             |
| <i>Psrb-6</i> R                                                                                                                               | tttatttctctgtagaaattcaag       |             |
| <i>Pgpa-4</i> F                                                                                                                               | ggatccattctcaaaatcgagaagtc     |             |
| <i>Pgpa-4</i> R                                                                                                                               | tgttgaaaagtgttcacaaaatg        |             |
| <i>Pgcy-15</i> F                                                                                                                              | ccatgacgacgcttgatagtgc         |             |
| <i>Pgcy-15</i> R                                                                                                                              | agctgatgggatgtaggcagcac        |             |
| <i>Psra-7</i> F                                                                                                                               | agacgacatgatctagatgactctag     |             |
| <i>Psra-7</i> R                                                                                                                               | ggcttcaatatttcgagaaactgc       |             |
| <i>Pflp-21</i> F                                                                                                                              | tgaggtcacgcaacttgatga          |             |
| <i>Pflp-21</i> R                                                                                                                              | gaaaatgacttttgatttga           |             |
| <i>Pacr-5</i> F                                                                                                                               | atgttgaaaaaacgtacggctctc       |             |
| <i>Pacr-5</i> R                                                                                                                               | gctgaaaattgttttaagcattg        |             |
| <i>Pmyo-3</i> F                                                                                                                               | ccgacaaaacatgagtatttc          |             |
| <i>Pmyo-3</i> R                                                                                                                               | ccctctagatggatctagt            |             |
| <i>Punc-25</i> F                                                                                                                              | agagaaaagcgcttcataagacg        |             |
| <i>Punc-25</i> R                                                                                                                              | tttggcggtgaaactgagctttc        |             |
| <i>Punc-129</i> F                                                                                                                             | gaaacatgatatcgacggacata        |             |
| <i>Punc-129</i> R                                                                                                                             | cttgcttctctccaatttctctg        |             |
| <i>Pstr-2</i> F                                                                                                                               | atataaatcaatgggatcaacgcc       |             |
| <i>Pstr-2</i> R                                                                                                                               | tttatggatcacgagtattcg          |             |
| <i>TAX-2(F36F2.5.1)</i> F                                                                                                                     | atgtatcaagttccaaaacgagca       |             |
| <i>TAX-2(F36F2.5.1)</i> R                                                                                                                     | ttaatcgcatgtagtttctgtgtcc      |             |
| <i>ODR-3(C34D1.3.1)</i> F                                                                                                                     | atgggctcatgccagagc             |             |
| <i>ODR-3(C34D1.3.1)</i> R                                                                                                                     | ttacatcattctgcttttgtaaattctctg |             |
|                                                                                                                                               |                                |             |
| Genotyping primers                                                                                                                            |                                |             |
| <i>unc-2-GFP<sub>11</sub></i> F                                                                                                               | ggattgtaacggaggagtagg          |             |
| <i>unc-2-GFP<sub>11</sub></i> Rin                                                                                                             | ctcgtgaagaacctgtgatc           |             |
| <i>unc-2-GFP<sub>11</sub></i> Rout                                                                                                            | ctaaacaattgcccatcgagga         |             |

|                                                                                        |                                  |                                                                                                                                                                                                                                                                               |
|----------------------------------------------------------------------------------------|----------------------------------|-------------------------------------------------------------------------------------------------------------------------------------------------------------------------------------------------------------------------------------------------------------------------------|
| <i>him-5(xj001)</i> F                                                                  | actacttctctaaatccaatccagg        |                                                                                                                                                                                                                                                                               |
| <i>him-5(xj001)</i> R                                                                  | agcttcattcactactctcgtc           |                                                                                                                                                                                                                                                                               |
| CRISPR information                                                                     |                                  |                                                                                                                                                                                                                                                                               |
| TR389; <i>him-5(xj001)</i> mutant was deleted 5 bases on the second exon of D1086.4a.1 | aacagttggctgc<atcgc>cggtcgttcaca |                                                                                                                                                                                                                                                                               |
| Software and Algorithms                                                                |                                  |                                                                                                                                                                                                                                                                               |
| ImageJ                                                                                 | NIH                              | <a href="https://imagej.nih.gov/ij/download.html">https://imagej.nih.gov/ij/download.html</a>                                                                                                                                                                                 |
| Igor pro 6.3                                                                           | WaveMetrics                      | <a href="https://www.wave-metrics.com/products/igorpro/igorpro.htm">https://www.wave-metrics.com/products/igorpro/igorpro.htm</a>                                                                                                                                             |
| GraphPad Prism 8                                                                       | GraphPad                         | <a href="https://www.graphpad.com/scientific-software/prism/">https://www.graphpad.com/scientific-software/prism/</a>                                                                                                                                                         |
| MATLAB                                                                                 | MathWorks                        | <a href="https://www.mathworks.com/products/matlab.html?s_tid=hp_products_matlab">https://www.mathworks.com/products/matlab.html?s_tid=hp_products_matlab</a>                                                                                                                 |
| MetaMorph                                                                              | Molecular Devices                | <a href="https://www.moleculardevices.com/systems/metamorph-research-imaging/metamorph-microscopy-automation-and-image-analysis-software">https://www.moleculardevices.com/systems/metamorph-research-imaging/metamorph-microscopy-automation-and-image-analysis-software</a> |
| WormLab                                                                                | MBF Bioscience                   | <a href="https://www.mbfioscience.com/wormlab">https://www.mbfioscience.com/wormlab</a>                                                                                                                                                                                       |

1

## 2 CONTACT FOR REAGENT AND RESOURCE SHARING

3 Further information and requests for resources and reagents should be directed to and will be  
4 fulfilled by the Lead Contact Xia-Jing Tong ([tongxj@shanghaitech.edu.cn](mailto:tongxj@shanghaitech.edu.cn)).

5

## 6 EXPERIMENTAL MODEL AND SUBJECT DETAILS

### 7 Animals

8 *C. elegans* were maintained under standard conditions at 20 °C on plates made from  
9 nematode growth medium (NGM). *E. coli* OP50 was used as a food source for all experiments  
10 except where HB101 *E. coli* was utilized for electrophysiology study. A description of all alleles

1 can be found at <http://www.wormbase.org/#012-34-5>. Animals were obtained from Bristol  
2 variety N2 strain unless specially indicated. Transgenic animals were prepared by  
3 microinjection, and integrated transgenes were isolated following UV irradiation or by miniMos  
4 insertion.

5

## 6 **Plasmids**

7 All worm expression vectors were modified versions of pPD49.26 (A. Fire) or miniMos vector  
8 pCFJ910. Standard methods and procedures were utilized for all of the plasmids. A 3.1 kb  
9 *ceh-36* promoter was used for expression in ASE and AWC chemosensory neurons. A 3 kb  
10 *odr-10* promoter was used for expression in AWA chemosensory neurons. A 3 kb *str-2*  
11 promoter was used for expression in AWC chemosensory neurons. A 3 kb *str-1* promoter was  
12 used for expression in AWB chemosensory neurons. A 3 kb *srb-6* promoter was used for  
13 expression in ADF, ADL, and ASH chemosensory neurons. A 3 kb *gpa-4* promoter was used  
14 for expression in ASI chemosensory neurons. A 3 kb *gcy-15* promoter was used for expression  
15 in ASG chemosensory neurons. A 3.9 kb *sra-7* promoter was used for expression in ASK  
16 chemosensory neurons. A 4.1 kb *flp-21* promoter was used for expression in the majority of  
17 the chemosensory neurons. A 4.3 kb *acr-5* promoter was used for expression in DB and VB  
18 motor neurons. A 2.4 kb *myo-3* myosin promoter was used for expression in body muscles.  
19 For rescue experiments, *TAX-2* (F36F2.5.1), *ODR-3* (C34D1.3.1), and *ACR-16* (F25G6.3)  
20 were amplified from the N2 cDNA library using gene-specific primers.

21

## 22 **Generation of single-copy insertion allele by homologous recombination**

23 The xjSI0002 allele encoding RFP-tagged *ACR-16* minigene under the muscle-specific *myo-*  
24 *3* promoter was generated by miniMOS (Frokjaer-Jensen et al., 2014). The RFP sequence  
25 was inserted between the third and the fourth transmembrane segment of *ACR-16*.

26

## 27 **Aldicarb assay**

1 The aldicarb assay was performed as previously described (Vashlishan et al., 2008). Aldicarb  
2 (ApexBio) was dissolved in ethyl alcohol and added to NGM at a final concentration of 1.4mM  
3 (Testing hermaphrodites) or 0.5 mM (Testing males). These plates (35mm) were seeded with  
4 75 ul OP50 and allowed to dry overnight before use. More than 20 animals at the young adult  
5 stage (otherwise indicated) were picked on an aldicarb plate for aldicarb assay. Animals were  
6 scored as paralyzed when they did not respond to the platinum wire prodding. The paralyzed  
7 animals were counted every 10 or 15 minutes. At least three double-blind replicates for each  
8 group were tested.

9

## 10 **Preparation of conditioned media**

11 Hermaphrodite and male-secreted metabolites were collected according to a previous  
12 publication (Srinivasan et al., 2008). Synchronized *C. elegans* (WT [N2], *him-5* [N2], WT  
13 [TR389], *him-5* [TR389], *daf-22* [N2], and *daf-22; him-5* [N2]) with a density of 10,000  
14 worms/plates (90 mm, three plates) were grown on the nematode growth media (NGM)  
15 agarose (seeded with *E. coli* strain OP50) at 20 °C. There were  $43.07 \pm 0.77\%$ ,  $39.26 \pm 1.55\%$ ,  
16 and  $37.29 \pm 1.28\%$  males in *him-5* (N2), *daf-22; him-5* (N2), and *him-5* (TR389) strains  
17 respectively. After worms reached the young adult stages, they were collected and washed  
18 three times with M9 buffer to remove bacteria. To further remove the bacteria in the gut, the  
19 worms were then placed in M9 buffer in a shaker (150 rpm) at 20 °C for 30 minutes, and rinsed  
20 three times with ddH<sub>2</sub>O. Subsequently, worm-secreted metabolites were collected by  
21 incubating the worms in ddH<sub>2</sub>O in a shaker (150 rpm) for 3 hours with a density of 30,000  
22 worms/ml. Afterward, the worms were removed by settling on ice for 5 minutes. The  
23 metabolites were filtered through 0.22 µm filters, aliquoted and stored at -80 °C. For  
24 conditioned medium preparation, 10 µl metabolites mixed with 90 µl OP50 *E. coli* were spread  
25 on a 35 mm NGM plate. Plates were allowed to dry overnight before use.

26

## 27 **Calcium imaging**

1 Muscle calcium responses were measured by detecting fluorescence intensity changes of  
2 GCaMP3. *C. elegans* expressing GCaMP3 in the body-wall muscle (*Pmyo-3::GCaMP3*) and  
3 Chrimson in the DB and VB neurons (*Pacr-5::Chrimson*) were used for calcium imaging  
4 experiments. Young adult animals fed with 1.6 mM ATR (in 100  $\mu$ l *E. coli* OP 50) were  
5 immobilized on 10% agarose pads by polystyrene microbeads. Fluorescence images were  
6 captured using a Nikon 60x 1.4 NA objective on a Nikon spinning-disk confocal system  
7 (Yokogawa CSU-W1) at 10 ms per frame. We used wide-field illumination with a nominal  
8 wavelength at 640 nm for Chrimson activation. The GCaMP signals were captured using 488  
9 nm laser excitation and were analyzed by ImageJ software.

10

11 Calcium responses in the soma of AWB sensory neurons were measured by detecting  
12 fluorescence intensity changes of GCaMP6f. A home-made microfluidic device was used for  
13 calcium imaging as previously described (Liu et al., 2019; Zou et al., 2018). Briefly, a young  
14 adult animal was rinsed by M9 buffer and loaded into a home-made microfluidic device with  
15 its nose exposed to buffer under laminar flow. Diluted metabolites of N2 hermaphrodite and  
16 *him-5* mutants was delivered using a programmable automatic drug feeding equipment (MPS-  
17 2, InBio Life Science Instrument Co. Ltd, Wuhan, China). For  $Ca^{2+}$  fluorescence imaging in  
18 AWB, the neurons were exposed under fluorescent excitation light for 30 seconds before  
19 recording, to eliminate the light-evoked calcium transients. During the recording process, for  
20 the first 5 seconds, we gave the M9 solution then switched hermaphrodite excretome or male  
21 excretome for 30 seconds, removing extract liquid from 35 second and washing for 25 seconds.  
22 The AWB neurons were imaged with a 60X objective (Olympus) and EMCCD camera (Andor  
23 iXonEM) at 100 ms/frame. The imaging sequences were subsequently analyzed using Image-  
24 Pro Plus6 (Media Cybernetics, Inc., Rockville, MD, USA).

25

## 26 **Adult locomotion analysis**

27 To analyze adult locomotor behavior, young adult worms were washed with M9 buffer before  
28 transferred to the unseeded NGM plate, and allowed to recover for 5 minutes. Animal

1 locomotion was recorded at a rate of 10 frames per second (fps) for 1 minute. The mean body-  
2 bend amplitude and crawling locomotion velocity were analyzed by WormLab. All the assays  
3 were done at 25 °C.

4

#### 5 **Mating behaviors**

6 Mating efficiency was assessed as previously described (Yin et al., 2017). Briefly, two young  
7 adult stage hermaphrodites from male- or hermaphrodite-conditioned medium were cultured  
8 with two young-adult males for 24 hours. Successful mating was scored when more than 3  
9 male progenies were generated in the mating plate. Mating efficiency was obtained by  
10 calculating the percentage of successful mating in more than 15 plates.

11

#### 12 **Liquid culture and mass spectrometric analysis**

13 The crude pheromone extracts were prepared according to a previously published protocol  
14 (Zhang et al., 2013). N2 wild type, *him-5* mutant, *daf-22; him-5* mutant or TR389 *him-5* mutant  
15 worms were grown for two generations on 60 mm NGM plate seeded with *E. coli* OP50 bacteria.  
16 Worms from four plates were washed by M9 buffer and cultured in 50 ml S complete medium  
17 (100 mM NaCl, 50 mM KPO<sub>4</sub>, 3 mM CaCl<sub>2</sub>, 3 mM MgSO<sub>4</sub>, 5 µg/mL Cholesterol, 10 mM  
18 Potassium citrate, 50 µM disodium EDTA, 25 µM FeSO<sub>4</sub>, 10 µM MnCl<sub>2</sub>, 10 µM ZnSO<sub>4</sub>, 1 µM  
19 CuSO<sub>4</sub>) at 20 °C and 200 rpm. The animals were cultured with shaking at 200 rpm for 7 days  
20 (around 30,000 worms/ 50 ml). 25X Concentrated *E. coli* OP50 bacteria were supplemented  
21 every day (0.3 ml for day 1, 1 ml for day 2-5, and 2 ml for day 6-7). After 7 days, the supernatant  
22 medium containing metabolites was collected by centrifugation (3,000 g, 10 minutes). Then  
23 the supernatant media were frozen at -80 °C, lyophilized, and extracted with methanol for  
24 UPLC-MS (Ultra Performance Liquid Chromatography) analysis. UPLC-MS was performed  
25 using a Sciex TripleTOF 6600 system. Chromatographic separations were achieved using a  
26 Waters Acquity UPLC BEH C18 column (1.7 µm, 2.1 × 10 mm) with a flow rate of 0.4 ml/min.  
27 Data acquisition and processing were performed by Analyst and Peakview (Sciex).



1

## 2 **Genetic ablation with miniSOG**

3 The genetically encoded photosensitizer, miniSOG, was used to ablate specific neurons as  
4 previously described (Qi et al., 2012). Synchronized Late L1 larva animals (24 hours after egg  
5 hatching at 20°C) expressing miniSOG under specific promoters were exposed to wide-field  
6 blue light (460 nm) at an intensity of 57 mW/cm<sup>2</sup> for 30 minutes, then animals were grown in  
7 the 20 °C incubator before experiments. The ablation efficiency was measured by comparing  
8 mCherry fluorescent signal with and without blue light stimulation.

9

## 10 **Optogenetic activation of chemosensory neurons**

11 To prepare the plates for optogenetic activation of neurons, 1.6 mM of all-trans-retinal (ATR,  
12 100 mM dissolved in ethanol) or ethanol (control) was mixed with OP50 *E.coli* culture and  
13 spotted on 35 mm NGM plates. Plates were allowed to dry for 24 hours before usage.  
14 Transgenic worms with channelrhodopsin variant CHIEF expressed in ASJ/ASI, AWA, AWB,  
15 or AWC chemosensory neurons were grown overnight on the NGM plates. Animals at L4 larval  
16 stages received 100 ms pulse stimulation of blue light (460 nm wavelength, 2.4 mW/mm<sup>2</sup>  
17 power) for 10 minutes (5 times) until the animals entered the adult stage.

18

## 19 **Fluorescent microscopy imaging**

20 For quantitative analysis of fluorescence intensities and densities, images were captured  
21 using a 100x (NA=1.4) objective on an Olympus microscope (BX53). Young adult worms were  
22 immobilized with 30 µg/µl 2,3-Butanedione monoxime. The maximum intensity of dorsal cord  
23 projections of Z-series stacks was obtained by Metamorph software (Molecular Devices). Line  
24 scans were analyzed in Igor Pro (WaveMetrics) using a custom script (Dittman and Kaplan,  
25 2006). The mean fluorescence intensities of reference FluoSphere microspheres (0.5 µm,  
26 ThermoFisher Scientific) were measured during each experiment controlled for changes in  
27 illumination intensities. To assess the synaptic accumulation of fluorescent proteins, we used

1 the calculation of  $\Delta F/F$  as  $(F_{\text{puncta}} - F_{\text{axon}})/F_{\text{axon}}$ . And we also counted the density of fluorescent  
2 puncta.

3

4

## 5 **Electrophysiology**

6 Electrophysiology was conducted on dissected *C. elegans* as previously described (Hu et al.,  
7 2012). Worms were superfused in an extracellular solution containing 127 mM NaCl, 5 mM  
8 KCl, 26 mM NaHCO<sub>3</sub>, 1.25 mM NaH<sub>2</sub>PO<sub>4</sub>, 20 mM glucose, 1 mM CaCl<sub>2</sub>, and 4 mM MgCl<sub>2</sub>,  
9 bubbled with 5% CO<sub>2</sub>, 95% O<sub>2</sub> at 22 °C. Whole-cell recordings were carried out at -60 mV for  
10 mEPSCs, and 0 mV for mIPSCs. The internal solution contained 105 mM CH<sub>3</sub>O<sub>3</sub>SCs, 10 mM  
11 CsCl, 15 mM CsF, 4 mM MgCl<sub>2</sub>, 5 mM EGTA, 0.25 mM CaCl<sub>2</sub>, 10 mM HEPES, and 4 mM  
12 Na<sub>2</sub>ATP. The solution was adjusted to pH 7.2 using CsOH.

13

## 14 **Statistics**

15 All data were reported as mean  $\pm$  SEM (standard error of the mean). Statistical analyses were  
16 performed using GraphPad Prism (version 8). We calculated p values by two-way ANOVA  
17 (Fig. 1B, 1D, 2D-F, Supplementary Fig. 2A-E, 3, 5, 9A-G, 10A-C), two-way ANOVA with post-  
18 hoc Sidak multiple comparisons (Fig. 2B-C, 2G, 3B-C, 3F-G, 4C, 4E, 4I-J, Supplementary Fig.  
19 6A-B), one-way ANOVA with post-hoc Dunnett multiple comparisons (Fig. 2H-I, 3E, 4D, 7B-  
20 D, Supplementary Fig. 7A-C) and unpaired Student's t-test (Fig. 1F-G, 1I-J, 1L-M, 4H, 5A-E,  
21 6D-E, Supplementary Fig. 1B, 4A, 4C, 11A-B). In all figures, p values are denoted as \* < 0.05,  
22 \*\* < 0.01, \*\*\* < 0.001.

23

## 24 **FIGURE LEGENDS:**

25 **Fig. 1 The male excretome increases cholinergic synaptic transmission at**  
26 **hermaphrodite NMJ.** (A) Schematic illustration of *C. elegans* reproduction. Hermaphrodites  
27 with two X chromosomes generate all hermaphrodite progeny via self-fertilization. While  
28 hermaphrodites are crossed with males that have a single X chromosome, an equal ratio of  
29 hermaphrodite and male offspring are generated. (B) Time course analysis of 1.4 mM aldicarb-

1 induced paralysis in hermaphrodites generated from hermaphrodite self-fertilization (black,  
2 Self-fertilization) and hermaphrodite-male crossing (orange, Crossed). (C) Schematic  
3 illustration of conditioned medium preparation. 30,000 young-adult wild type (WT) and *him-5*  
4 mutant worms were collected and incubated in 1 ml ddH<sub>2</sub>O for 3 hours. Metabolites secreted  
5 by hermaphrodites and males were collected and used to make hermaphrodite-conditioned  
6 (Herm-cond) and male-conditioned (Male-cond) medium. (D) Time course analysis of  
7 Aldicarb-induced paralysis in hermaphrodites cultured in hermaphrodite-conditioned medium  
8 (black, Herm-cond) and male-conditioned medium (orange, Male-cond). (E) Schematic  
9 illustration showing calcium current recording at the *C. elegans* NMJ. Chrimson driven by the  
10 *acr-5* promoter was expressed specifically in cholinergic motor neurons, and GCaMP3 under  
11 the *myo-3* promoter was expressed in the body-wall muscle. (F-G) Chrimson-evoked calcium  
12 transients in body-wall muscle were analyzed using GCaMP3 as a calcium indicator. For adult  
13 hermaphrodites cultured in hermaphrodite-conditioned medium (black, Herm-cond) or male-  
14 conditioned medium (orange, Male-cond), the averaged responses (F) and the averaged and  
15 individual relative increase in GCaMP3 fluorescence intensity  $\Delta F/F$  (G) are shown. The grey  
16 shadings in F indicate the SEM of GCaMP3 responses. The dashed line indicates when the  
17 illumination with nominal wavelength at 640 nm for Chrimson activation was applied. (H-J)  
18 Endogenous acetylcholine transmission was assessed by recording mEPSCs from body  
19 muscles of wild type adult hermaphrodites cultured in hermaphrodite-conditioned or male-  
20 conditioned medium. Representative mEPSC traces (H), the mean mEPSC rates (I), and the  
21 mean mEPSC amplitudes (J) are shown. (K-M) Endogenous GABA transmission was  
22 assessed by recording mIPSCs from body muscles of wild type adult hermaphrodites cultured  
23 in hermaphrodite-conditioned or male-conditioned medium. Representative mIPSC traces (K),  
24 the mean mIPSC rate (L), and the mean mIPSC amplitude (M) are shown. The data for  
25 individual animal analyzed are indicated. In B, D, F-G, I-J, L-M, \*  $p < 0.05$ , \*\*\*  $p < 0.001$ , ns  
26 not significant, two-way ANOVA for B and D, unpaired Student's t-test for F-G, I-J, and L-M.  
27

1 **Fig. 2 The male excretome modulates the hermaphrodite NMJ synaptic transmission in**  
2 **a developmental-stage-dependent manner.** (A) Schematic illustration of the life cycles of *C.*  
3 *elegans* and the time when the hermaphrodite-conditioned medium (dashed black lines) or  
4 male-conditioned medium (solid orange lines) was applied. (B) The percentage of animals  
5 paralyzed on 1.4 mM aldicarb at 70 minutes were plotted for hermaphrodites cultured in male-  
6 conditioned medium (orange) starting from the egg stage, L1 stage, L2-L3 stage, and mid-L4  
7 stage. Hermaphrodites cultured in hermaphrodite-conditioned medium (black) served as  
8 controls. (C) The percentage of animals paralyzed on 1.4 mM aldicarb at 70 minutes were  
9 plotted for hermaphrodites cultured in male-conditioned medium from the egg stage to the  
10 mid-L4 stage (L4 out) and young adult stage (Adult out); hermaphrodites cultured in  
11 hermaphrodite-conditioned medium (black) or male-conditioned medium (orange) served as  
12 controls. (D-F) Time course analysis of aldicarb-induced paralysis in hermaphrodites cultured  
13 in hermaphrodite-conditioned medium (black) and male-conditioned medium (orange) in  
14 CB4856 (D), AB3 (E), and TR389 (F) strains. (G) The percentage of animals paralyzed on 1.4  
15 mM aldicarb at 80 minutes were plotted for N2 hermaphrodites cultured in N2 hermaphrodite  
16 (N2 herm-cond)-, N2 male (N2 male-cond)-, TR389 hermaphrodite (TR389 Herm-cond)- or  
17 TR389 male (TR389 Male-cond)-conditioned medium. (H) Locomotion behavior analysis of  
18 single adult hermaphrodite cultured in N2 hermaphrodite (Herm-cond)-, TR389 male (TR389  
19 male-cond)-, and N2 male (Male-cond)-conditioned medium. The averaged and individual  
20 crawling locomotion velocities were plotted. (I) Measurement of hermaphrodite mating  
21 efficiency cultured in N2 hermaphrodite-, TR389 male-, and N2 male-conditioned medium. In  
22 B-I, \*  $p < 0.05$ , \*\*\*  $p < 0.001$ , ns not significant, two-way ANOVA with post-hoc Sidak multiple  
23 comparisons for B-C and G, two-way ANOVA for D-F, one-way ANOVA with post-hoc Dunnett  
24 multiple comparisons for H-I.

25  
26 **Fig. 3 Ascarosides in the male environment modulate hermaphrodite NMJ synaptic**  
27 **transmission.** (A) Proposed model of peroxisomal  $\beta$ -oxidation enzymes ACOX-1, MAOC-1,

1 DHS-28, and DAF-22 in ascaroside side-chain biosynthesis. (B) The percentage of animals  
2 paralyzed on 1.4 mM aldicarb at 70 minutes were plotted for N2 hermaphrodites cultured in  
3 hermaphrodite (N2 herm-cond)-, male (N2 male-cond)-, *daf-22* mutants herm (*daf-22* herm-  
4 cond)- or *daf-22* mutant male (*daf-22* male-cond)-conditioned medium. (C) The percentage of  
5 animals paralyzed on 0.5 mM aldicarb at 100 minutes were plotted for *daf-22* mutant males  
6 cultured in hermaphrodite (N2 herm-cond)-, male (N2 male-cond)-, *daf-22* mutants herm (*daf-22*  
7 herm-cond)- or *daf-22* mutant male (*daf-22* male-cond)-conditioned medium. (D)  
8 Schematic illustration of excretome preparation for UPLC-MS. Around 30,000 freshly starved  
9 worms were cultured in S medium supplemented with concentrated OP50 for 7 days. The  
10 excretomes were collected by centrifugation, filtration, and lyophilized extraction, followed by  
11 UPLC-MS analysis. (E)  $\beta$ -hydroxylated ascaroside profiles in excretomes obtained from N2  
12 hermaphrodites (N2 herm excretome), N2 mixed-gender animals of *him-5* mutants (N2 male  
13 excretome), and TR389 mixed-gender animals (TR389 male excretome). (F) The percentage  
14 of animals paralyzed on 1.4 mM aldicarb at 90 minutes were plotted for  $\beta$ -oxidation mutants  
15 (*acox-1.1*, *maoc-1*, and *dhs-28*). (G) The percentage of animals paralyzed on 1.4 mM aldicarb  
16 at 70 minutes were plotted for N2 and *dhs-28* mutant hermaphrodites cultured in  
17 hermaphrodite-conditioned medium (Herm-cond), male-conditioned medium (Male-cond). In  
18 B-C, E-G, \*  $p < 0.05$ , \*\*  $p < 0.01$ , \*\*\*  $p < 0.001$ , ns not significant, two-way ANOVA with post-  
19 hoc Sidak multiple comparisons for B-C and F-G. one-way ANOVA with post-hoc Dunnett  
20 multiple comparisons for E.

21

22 **Fig. 4 AWB neurons sense the modulator ascarosides.** (A) The table lists all of the  
23 chemosensory neurons examined in the screen, the neuron-specific promoters used to drive  
24 miniSOG expression, and the impact of neuron ablation on sensing of modulator ascarosides.  
25 (B) Representative images showing that mCherry-labeled AWB neurons were specifically  
26 ablated by blue light-induced miniSOG activation. Scale bar, 40  $\mu\text{m}$ . (C) The percentage of  
27 animals paralyzed on 1.4 mM aldicarb at 80 minutes were plotted for hermaphrodites

1 expressing miniSOG in AWB neurons (*str-1* promoter) with and without blue-light induced  
2 ablation. Black: cultured in hermaphrodite-conditioned medium; Orange: cultured in male-  
3 conditioned medium. (D) Locomotion behavior analysis of single adult worm from AWB  
4 ablated hermaphrodites in hermaphrodite- and male-conditioned medium. The averaged  
5 crawling locomotion velocities were plotted. (E) The percentage of animals paralyzed on 1.4  
6 mM aldicarb at 90 minutes were plotted for hermaphrodites with AWB neurons optogenetically  
7 activated during the L4 stage. The channelrhodopsin variant CHIEF was expressed in AWB  
8 chemosensory neurons driven by the *str-1* promoter. The blue light was turned on to excite  
9 AWBs in transgenic animals fed with or without ATR. (F) Top panel: snapshots of GCaMP6f  
10 fluorescent signals of an AWB neuron before, during, and after addition of male excretome.  
11 Scale bar, 10  $\mu\text{m}$ . Bottom panel: the calcium trace showing the AWB neuron activated by male  
12 excretome. (G) Curves and average intensities of  $\text{Ca}^{2+}$  signals evoked by the hermaphrodite  
13 or male excretome in the soma of AWB with GCaMP6f expression. The shaded box represents  
14 the addition of the hermaphrodite or male excretome. (H) Scatter diagram and quantification  
15 of the  $\text{Ca}^{2+}$  change. Each point represents  $\text{Ca}^{2+}$  peak value from one animal. (I) The  
16 percentages of animals paralyzed on 1.4 mM aldicarb at 80 minutes were plotted for *tax-*  
17 *2(p691)* mutant hermaphrodites and TAX-2 expression restored in AWB or ASJ/ASI neurons  
18 cultured in hermaphrodite- (black) and male-conditioned medium (orange). (J) The  
19 percentages of animals paralyzed on 1.4 mM aldicarb at 80 minutes were plotted for *odr-*  
20 *3(n1605)* mutant hermaphrodites and ODR-3 expression restored in AWB neurons cultured in  
21 hermaphrodite- (black) and male-conditioned medium (orange). In C-E, H-J, \*\*\*  $p < 0.001$ , ns  
22 not significant, two-way ANOVA with post-hoc Sidak multiple comparisons for C, E and I-J,  
23 one-way ANOVA with post-hoc Dunnett multiple comparisons for D, unpaired Student's t-test  
24 for H.

25

26 **Fig. 5 Modulator ascarosides promote postsynaptic AchR synaptic localization.** (A) The  
27 puncta fluorescence intensities and densities marked by the excitatory synaptic GFP::*RAB-3*  
28 (under *unc-129* promoter) in dorsal nerve cord axons were unaltered by modulator

1 ascarosides. Representative images (top panel), mean puncta intensities and puncta density  
2 (bottom panel) are shown for hermaphrodites grown in hermaphrodite- or male-conditioned  
3 medium. (B) The puncta fluorescence intensities and densities marked by the inhibitory  
4 synaptic RFP::RAB-3 (under *unc-25* promoter) were unaltered in hermaphrodites cultured in  
5 male-conditioned medium. Representative images (top panel), mean puncta intensities and  
6 puncta density (bottom panel) are shown. (C-E) The muscle-specific ACR-16::RFP, UNC-  
7 29::RFP, and UNC-49::RFP fluorescence intensities and densities in hermaphrodites cultured  
8 in hermaphrodite- and male-conditioned medium. Representative images, mean puncta  
9 intensities and puncta density are shown separately. Scale bars, 5  $\mu\text{m}$ . \*\*  $p < 0.005$ , \*\*\*  $p <$   
10 0.001, ns not significant, unpaired Student's t-test.

11

12 **Fig. 6 Modulator ascarosides increase the abundance of excitatory presynaptic CaV2**

13 **calcium channels at the NMJ.** (A) Schematic illustration of split GFP experimental design.

14 Seven copies of the splitGFP 11 were inserted into the C-terminal of *unc-2* genomic loci by  
15 CRISPR-Cas9 system. The splitGFP1-10 was expressed in B-type cholinergic and GABAergic  
16 motor neurons by *unc-129* and *unc-47* promoters. The *unc-57-mCherry* under the same  
17 promoter was separated with splitGFP1-10 by SL2, and was also used as a coexpressed  
18 presynaptic marker. (B-C) Presynaptic UNC-2::splitGFP (green) and UNC-57::mCherry (red)  
19 were co-localized in the dorsal nerve cord at both excitatory (B) and inhibitory (C) synapses.

20 Representative images (top, scale bar, 10  $\mu\text{m}$ ) and linescan curves (bottom) are shown. For  
21 linescan curves, the mCherry signals were plotted on the left Y-axis, while the splitGFP signals  
22 were plotted on the right. 1 arbitrary fluorescence intensity unit equals 100 gray value. (D-E)

23 The puncta fluorescence intensities and densities of UNC-2::splitGFP in B-type motor neurons  
24 (D) and GABAergic motor neurons (E) of hermaphrodites cultured in hermaphrodite- or male-  
25 conditioned medium. Representative images (scale bar, 5  $\mu\text{m}$ ), mean puncta intensities, and  
26 puncta densities are shown. In D and E, \*  $p < 0.05$ , \*\*  $p < 0.01$ , ns not significant, unpaired  
27 Student's t-test.

1

2 **Fig. 7 CaV2 calcium channel is the synaptic target of the modulator ascarosides. (A–C)**

3 Endogenous acetylcholine transmission was assessed by recording mEPSCs from body  
4 muscles of wild type and *unc-2* mutant adult hermaphrodites cultured in hermaphrodite- or  
5 male-conditioned medium. Representative mEPSC traces (A), the mean mEPSC rates (B),  
6 and the mean mEPSC amplitudes (C) are shown. The data for wild type (WT) are the same  
7 as in Fig. 1H-J. (D) Locomotion behavior analysis of the single wild type and *unc-2* mutant  
8 hermaphrodite in hermaphrodite- and male-conditioned medium. The averaged and individual  
9 locomotion velocities were plotted. In B-D, \*  $p < 0.05$ , \*\*\*  $p < 0.001$ , ns not significant, one-  
10 way ANOVA with post-hoc Dunnett multiple comparisons.

11

12 **Supplementary Fig. 1 The physiological muscle excitability is potentiated in**

13 **hermaphrodites from the male-conditioned medium.** (A) Averaged Chrimson-evoked  
14 calcium transients in body-wall muscle were analyzed in hermaphrodites cultured in  
15 hermaphrodite-conditioned medium (black) or male-conditioned medium (orange). The  
16 averaged responses (A) and the endogenous GCaMP3 fluorescence intensity (B) were shown.  
17 The gray and orange shadings in A indicate SEM of GCaMP3 responses. The numbers of  
18 animals are indicated inside the bars. In B, \*  $p < 0.05$ , unpaired Student's t-test.

19

20 **Supplementary Fig. 2 The male environment modulates the hermaphrodite NMJ**

21 **synaptic transmission in a developmental-stage-dependent manner.** (A-D) Time course  
22 analysis of aldicarb-induced paralysis in hermaphrodites cultured in male-conditioned medium  
23 (orange) starting from egg stage (A), L1 (B), L2-L3 stage (C), and mid-L4 stage (D).  
24 Hermaphrodites cultured in hermaphrodite-conditioned medium (black) served as controls. (E)  
25 Time course analysis of aldicarb-induced paralysis in hermaphrodites cultured in male-  
26 conditioned medium from the egg stage to the L4 (pink) and young adult stage (dark red),  
27 hermaphrodites cultured in hermaphrodite-conditioned medium (black), and male-conditioned  
28 medium (orange). \*\*\*  $p < 0.001$ , ns not significant, two-way ANOVA.



1  
2  
3  
4  
5  
6  
7  
8  
9  
10  
11  
12  
13  
14  
15  
16  
17  
18  
19  
20  
21  
22  
23  
24  
25  
26

**Supplementary Fig. 3 TR389 hermaphrodites can be modulated by the modulator ascarosides.** Time course analysis of aldicarb-induced paralysis in TR389 hermaphrodite grown under N2 hermaphrodite (black, N2 herm-cond)- or N2 male-conditioned (orange, N2 male-cond) medium. \*\*\*  $p < 0.001$ , ns not significant, two-way ANOVA.

**Supplementary Fig. 4 The male excretome does not change hermaphrodite body-bend curvature.** (A) Scatter plot showing the body-bend curvature in hermaphrodites (black) and males (red). (B) Color plot showing the waves of curvature propagating along the body of representative hermaphrodite (Herm, top) and male (Male, bottom). (C) Scatter plot showing the body-bend curvature in hermaphrodites from hermaphrodite- (black) and male-conditioned (orange) medium. (D) Color plot showing the waves of curvature propagating along the body of representative hermaphrodite from hermaphrodite- (top) and male-conditioned (bottom) medium. In A and C, \*\*\*  $p < 0.001$ , ns not significant, unpaired Student's t-test.

**Supplementary Fig. 5 The male excretome does not modulate hermaphrodite brood size.** Time course analysis of the average number of eggs laid by hermaphrodites from hermaphrodite- and male-conditioned medium. ns not significant, two-way ANOVA.

**Supplementary Fig. 6 The male environment cannot modulate NMJ synaptic transmission in males.** The percentage of animals paralyzed on 0.5mM (A) or 1.4 mM (B) aldicarb at 90 minutes were plotted for wild type males (A) and *daf-22* mutant hermaphrodites (B) cultured in N2- and *daf-22* mutant-conditioned medium. \*\*\*  $p < 0.001$ , ns not significant, two-way ANOVA with post-hoc Sidak multiple comparisons.

1 **Supplementary Fig. 7 UPLC-MS analysis of excretome from animal cultures.** (A) The  
2 relative abundance of ascr#10 in excretomes obtained from N2 hermaphrodites (N2 herm  
3 excre), N2 mixed-gender animals of *him-5* mutants (N2 male excre), and TR389 mixed-gender  
4 animals (TR389 male excre). (B) Ascaroside profiles in excretomes obtained from N2 mixed-  
5 gender animals of *him-5* mutants (N2 male excretome) and *daf-22* mixed-gender animals (*daf*-  
6 22 male excretome) showed that long-chain ascarosides were accumulated in *daf-22* mutant  
7 cultures. (C) Saturated ascaroside profiles in excretomes obtained from N2 hermaphrodites  
8 (N2 excretome), N2 mixed-gender animals of *him-5* mutants (N2 male excretome), and TR389  
9 mixed-gender animals (TR389 male excretome). \*  $p < 0.05$ , \*\*  $p < 0.01$ , one-way ANOVA with  
10 post-hoc Dunnett multiple comparisons.

11  
12 **Supplementary Fig. 8 Genetic ablation efficiency by miniSOG.** (A) Schematic illustration  
13 of blue light stimulation pattern. (B) Representative images of multiple chemosensory neurons  
14 expressing miniSOG and mCherry (*flp-21* promoter) before (no blue light) and after (weak and  
15 strong) blue light stimulation (scale bar, 5  $\mu\text{m}$ ). (C) Ablation efficiency was calculated after 15,  
16 30, and 50 minutes of blue light stimulation. Weak and strong labels indicated ablation  
17 efficiencies by examining mCherry fluorescent signals in chemosensory neurons. The  
18 numbers of animals analyzed were indicated for each condition.

19  
20 **Supplementary Fig. 9 ASE, AWC, AWA, ASH, ASI, ADF, ASG, ASK, ADL, and ASJ**  
21 **chemosensory neurons are dispensable for sensing modulator ascarodies.** Time course  
22 analysis of aldicarb-induced paralysis in hermaphrodites with ablated ASE/AWC (*ceh-36*  
23 promoter, A), AWA (*odr-10* promoter, B), ASH/ADF/ADL (*srb-6* promoter, C), ASI (*gpa-4*  
24 promoter, D), ASG (*gcy-15* promoter, E), ASK (*sra-7* promoter, F) and ASJ/ASI (*daf-28*  
25 promoter, G) grown in hermaphrodite-conditioned medium (black) or male-conditioned  
26 medium (orange). \*\*  $p < 0.01$ , \*\*\*  $p < 0.001$ , two-way ANOVA.

27

1 **Supplementary Fig. 10 Activation of other sensory neurons does not change aldicarb**  
2 **sensitivity in hermaphrodites.** (A-C) Time course analysis of aldicarb-induced paralysis in  
3 hermaphrodites with ASJ/ASI (A), AWA (B), or AWC (C) optogenetically activated during the  
4 L3-L4 stage. The channelrhodopsin variant CHIEF was expressed in ASJ/ASI, AWA or AWC  
5 chemosensory neurons driven by the neuron-specific *daf-28*, *odr-10* and *str-2* promoters. The  
6 blue light was turned on (orange) or off (black) in the presence of ATR. \*\*\*  $p < 0.001$ , ns not  
7 significant, two-way ANOVA.

8

9 **Supplementary Fig. 11 Excitatory and inhibitory synapse structures are not affected by**  
10 **the modulator ascarosides.** (A) The puncta fluorescence intensities and densities marked  
11 by the excitatory synaptic UNC-57::mCherry (under *unc-129* promoter) in dorsal nerve cord  
12 axons were unaltered by modulator ascarosides. Representative images (top panel), mean  
13 puncta intensities and puncta density (bottom panel) are shown for hermaphrodites grown in  
14 hermaphrodite- or male-conditioned medium. (B) The puncta fluorescence intensities and  
15 densities marked by the inhibitory synaptic UNC-57::mCherry (under *unc-47* promoter) were  
16 unaltered in hermaphrodites cultured in male-conditioned medium. Representative images  
17 (top panel), mean puncta intensities and puncta density (bottom panel) are shown. ns not  
18 significant, unpaired Student's t-test.

## REFERENCES:

19 Alcazar, R.M., Lin, R.L., and Fire, A.Z. (2008). Transmission Dynamics of Heritable Silencing  
20 Induced by Double-Stranded RNA in *Caenorhabditis elegans*. *Genetics* 180, 1275-1288.  
21 Aprison, E.Z., and Ruvinsky, I. (2017). Counteracting Ascarosides Act through Distinct  
22 Neurons to Determine the Sexual Identity of *C. elegans* Pheromones. *Curr Biol* 27, 2589-2599.  
23 Aprison, E.Z., and Ruvinsky, I. (2019a). Coordinated Behavioral and Physiological Responses  
24 to a Social Signal Are Regulated by a Shared Neuronal Circuit. *Curr Biol* 29, 4108-4115.  
25 Aprison, E.Z., and Ruvinsky, I. (2019b). Dynamic Regulation of Adult-Specific Functions of the  
26 Nervous System by Signaling from the Reproductive System. *Curr Biol* 29, 4116-4123.

- 1 Banerjee, N., and Hallem, E. (2018). Sexual Dimorphisms: How Sex-Shared Neurons  
2 Generate Sex-Specific Behaviors. *Curr Biol* 28, R254-R256.
- 3 Bargmann, C.I. (2006). Chemosensation in *C. elegans*. *WormBook*, 1-29.
- 4 Bayer, E.A., and Hobert, O. (2018). Past experience shapes sexually dimorphic neuronal  
5 wiring through monoaminergic signalling. *Nature* 561, 117-121.
- 6 Borcel, E., Palczynska, M., Krzisch, M., Dimitrov, M., Ulrich, G., Toni, N., and Fraering, P.C.  
7 (2016). Shedding of neurexin 3 beta ectodomain by ADAM10 releases a soluble fragment that  
8 affects the development of newborn neurons. *Sci Rep-Uk* 6.
- 9 Butcher, R.A., Fujita, M., Schroeder, F.C., and Clardy, J. (2007). Small-molecule pheromones  
10 that control dauer development in *Caenorhabditis elegans*. *Nat Chem Biol* 3, 420-422.
- 11 Butcher, R.A., Ragains, J.R., Li, W.Q., Ruvkun, G., Clardy, J., and Mak, H.Y. (2009).  
12 Biosynthesis of the *Caenorhabditis elegans* dauer pheromone. *P Natl Acad Sci USA* 106,  
13 1875-1879.
- 14 Cabantous, S., Terwilliger, T.C., and Waldo, G.S. (2005). Protein tagging and detection with  
15 engineered self-assembling fragments of green fluorescent protein. *Nature Biotechnology* 23,  
16 102-107.
- 17 Chao, H.T., Zoghbi, H.Y., and Rosenmund, C. (2007). MeCP2 controls excitatory synaptic  
18 strength by regulating glutamatergic synapse number. *Neuron* 56, 58-65.
- 19 Chen, P., and Hong, W.Z. (2018). Neural Circuit Mechanisms of Social Behavior. *Neuron* 98,  
20 16-30.
- 21 Chen, Q., Deister, C.A., Gao, X., Guo, B.L., Lynn-Jones, T., Chen, N.Y., Wells, M.F., Liu, R.P.,  
22 Goard, M.J., Dimidschstein, J., *et al.* (2020). Dysfunction of cortical GABAergic neurons leads  
23 to sensory hyper-reactivity in a Shank3 mouse model of ASD. *Nat Neurosci*.
- 24 Colavita, A., Krishna, S., Zheng, H., Padgett, R.W., and Culotti, J.G. (1998). Pioneer axon  
25 guidance by UNC-129, a *C-elegans* TGF-beta. *Science* 281, 706-709.
- 26 Cook, S.J., Jarrell, T.A., Brittin, C.A., Wang, Y., Bloniarz, A.E., Yakovlev, M.A., Nguyen,  
27 K.C.Q., Tang, L.T.H., Bayer, E.A., Duerr, J.S., *et al.* (2019). Whole-animal connectomes of  
28 both *Caenorhabditis elegans* sexes. *Nature* 571, 63-71.

- 1 Dittman, J.S., and Kaplan, J.M. (2006). Factors regulating the abundance and localization of  
2 synaptobrevin in the plasma membrane. *P Natl Acad Sci USA* *103*, 11399-11404.
- 3 Doan, R.N., Bae, B.I., Cubelos, B., Chang, C., Hossain, A.A., Al-Saad, S., Mukaddes, N.M.,  
4 Oner, O., Al-Saffar, M., Balkhy, S., *et al.* (2016). Mutations in Human Accelerated Regions  
5 Disrupt Cognition and Social Behavior. *Cell* *167*, 341-354.
- 6 Doan, R.N., Lim, E.T., De Rubeis, S., Betancur, C., Cutler, D.J., Chiochetti, A.G., Overman,  
7 L.M., Soucy, A., Goetze, S., Freitag, C.M., *et al.* (2019). Recessive gene disruptions in autism  
8 spectrum disorder. *Nat Genet* *51*, 1092-1098.
- 9 Dolphin, A.C., and Lee, A. (2020). Presynaptic calcium channels: specialized control of  
10 synaptic neurotransmitter release. *Nature Reviews Neuroscience* *21*, 213-229.
- 11 Dong, C.F., Dolke, F., and von Reuss, S.H. (2016). Selective MS screening reveals a sex  
12 pheromone in *Caenorhabditis briggsae* and species-specificity in indole ascaroside signalling.  
13 *Org Biomol Chem* *14*, 7217-7225.
- 14 Edison, A.S. (2009). *Caenorhabditis elegans* pheromones regulate multiple complex  
15 behaviors. *Curr Opin Neurobiol* *19*, 378-388.
- 16 Emmons, S.W. (2018). Neural Circuits of Sexual Behavior in *Caenorhabditis elegans*. *Annu*  
17 *Rev Neurosci* *41*, 349-369.
- 18 Fagan, K.A., Luo, J.T., Lagoy, R.C., Schroeder, F.C., Albrecht, D.R., and Portman, D.S.  
19 (2018). A Single-Neuron Chemosensory Switch Determines the Valence of a Sexually  
20 Dimorphic Sensory Behavior. *Curr Biol* *28*, 902-914.
- 21 Frokjaer-Jensen, C., Davis, M.W., Sarov, M., Taylor, J., Flibotte, S., LaBella, M., Pozniakovsky,  
22 A., Moerman, D.G., and Jorgensen, E.M. (2014). Random and targeted transgene insertion in  
23 *Caenorhabditis elegans* using a modified Mos1 transposon. *Nature Methods* *11*, 529-534.
- 24 Garcia, L.R., and Portman, D.S. (2016). Neural circuits for sexually dimorphic and sexually  
25 divergent behaviors in *Caenorhabditis elegans*. *Curr Opin Neurobiol* *38*, 46-52.
- 26 Garrison, J.L. (2012). Oxytocin/vasopressin-related peptides have an ancient role in  
27 reproductive behavior (vol 338, pg 540, 2012). *Science* *338*, 1029-1029.

- 1 Geisheker, M.R., Heymann, G., Wang, T.Y., Coe, B.P., Turner, T.N., Stessman, H.A.F.,  
2 Hoekzema, K., Kvarnung, M., Shaw, M., Friend, K., *et al.* (2017). Hotspots of missense  
3 mutation identify neurodevelopmental disorder genes and functional domains. *Nat Neurosci*  
4 *20*, 1043-1051.
- 5 Greene, J.S., Brown, M., Dobosiewicz, M., Ishida, I.G., Macosko, E.Z., Zhang, X.X., Butcher,  
6 R.A., Cline, D.J., McGrath, P.T., and Bargmann, C.I. (2016). Balancing selection shapes  
7 density-dependent foraging behaviour. *Nature* *539*, 254-258.
- 8 Hart, M.P., and Hobert, O. (2018). Neurexin controls plasticity of a mature, sexually dimorphic  
9 neuron. *Nature* *553*, 165-170.
- 10 Hata, Y., Slaughter, C.A., and Sudhof, T.C. (1993). Synaptic Vesicle Fusion Complex  
11 Contains Unc-18 Homolog Bound to Syntaxin. *Nature* *366*, 347-351.
- 12 Hu, Z.T., Hom, S., Kudze, T., Tong, X.J., Choi, S., Aramuni, G., Zhang, W.Q., and Kaplan,  
13 J.M. (2012). Neurexin and Neuroligin Mediate Retrograde Synaptic Inhibition in *C. elegans*.  
14 *Science* *337*, 980-984.
- 15 Iossifov, I., Ronemus, M., Levy, D., Wang, Z.H., Hakker, I., Rosenbaum, J., Yamrom, B., Lee,  
16 Y.H., Narzisi, G., Leotta, A., *et al.* (2012). De Novo Gene Disruptions in Children on the Autistic  
17 Spectrum. *Neuron* *74*, 285-299.
- 18 Isogai, Y., Wu, Z., Love, M.I., Ahn, M.H.Y., Bambah-Mukku, D., Hua, V., Farrell, K., and Dulac,  
19 C. (2018). Multisensory Logic of Infant-Directed Aggression by Males. *Cell* *175*, 1827-1841.
- 20 Izrayelit, Y., Srinivasan, J., Campbell, S.L., Jo, Y., von Reuss, S.H., Genoff, M.C., Sternberg,  
21 P.W., and Schroeder, F.C. (2012). Targeted metabolomics reveals a male pheromone and  
22 sex-specific ascaroside biosynthesis in *Caenorhabditis elegans*. *ACS Chem Biol* *7*, 1321-1325.
- 23 Jin, Y., Jorgensen, E., Hartwig, E., and Horvitz, H.R. (1999). The *Caenorhabditis elegans*  
24 gene *unc-25* encodes glutamic acid decarboxylase and is required for synaptic transmission  
25 but not synaptic development. *J Neurosci* *19*, 539-548.
- 26 Judson, M.C., Wallace, M.L., Sidorov, M.S., Burette, A.C., Gu, B., van Woerden, G.M., King,  
27 I.F., Han, J.E., Zylka, M.J., Elgersma, Y., *et al.* (2016). GABAergic Neuron-Specific Loss of

1 Ube3a Causes Angelman Syndrome-Like EEG Abnormalities and Enhances Seizure  
2 Susceptibility. *Neuron* 90, 56-69.

3 Kamiyama, D., Sekine, S., Barsi-Rhyne, B., Hu, J., Chen, B.H., Gilbert, L.A., Ishikawa, H.,  
4 Leonetti, M.D., Marshall, W.F., Weissman, J.S., *et al.* (2016). Versatile protein tagging in cells  
5 with split fluorescent protein. *Nat Commun* 7.

6 Klapoetke, N.C., Murata, Y., Kim, S.S., Pulver, S.R., Birdsey-Benson, A., Cho, Y.K., Morimoto,  
7 T.K., Chuong, A.S., Carpenter, E.J., Tian, Z.J., *et al.* (2014). Independent optical excitation of  
8 distinct neural populations. *Nature Methods* 11, 338-346.

9 Kurshan, P.T., Merrill, S.A., Dong, Y.M., Ding, C., Hammarlund, M., Bai, J.H., Jorgensen, E.M.,  
10 and Shen, K. (2018). gamma-Neurexin and Frizzled Mediate Parallel Synapse Assembly  
11 Pathways Antagonized by Receptor Endocytosis. *Neuron* 100, 150-166.

12 Lee, C., Kang, E.Y., Ganda, M.J., Eskin, E., and Geschwind, D.H. (2019). Profiling allele-  
13 specific gene expression in brains from individuals with autism spectrum disorder reveals  
14 preferential minor allele usage. *Nat Neurosci* 22, 1521-1532.

15 Lee, J., Chung, C., Ha, S., Lee, D., Kim, D.Y., Kim, H., and Kim, E. (2015). Shank3-mutant  
16 mice lacking exon 9 show altered excitation/inhibition balance, enhanced rearing, and spatial  
17 memory deficit. *Front Cell Neurosci* 9.

18 Levinson, J.N., and El-Husseini, A. (2005). Building excitatory and inhibitory synapses:  
19 Balancing neuroligin partnerships. *Neuron* 48, 171-174.

20 Li, Q., and Liberles, S.D. (2015). Aversion and Attraction through Olfaction. *Curr Biol* 25, R120-  
21 R129.

22 Liberles, S.D. (2014). Mammalian pheromones. *Annu Rev Physiol* 76, 151-175.

23 Liu, H., Qin, L., Li, R., Zhang, C., Al-Sheikh, U., and Wu, Z. (2019). Reciprocal modulation of  
24 5-HT and octopamine regulates pumping via feedforward and feedback circuits in *C. elegans*.  
25 *Proc Natl Acad Sci U S A* 116, 10598.

26 Liu, H.W., Li, L., Wang, W., Gong, J.H., Yang, X.F., and Hu, Z.T. (2018). Spontaneous Vesicle  
27 Fusion Is Differentially Regulated at Cholinergic and GABAergic Synapses. *Cell Rep* 22, 2334-  
28 2345.

- 1 Ludewig, A.H., Artyukhin, A.B., Aprison, E.Z., Rodrigues, P.R., Pulido, D.C., Burkhardt, R.N.,  
2 Panda, O., Zhang, Y.K., Gudibanda, P., Ruvinsky, I., *et al.* (2019). An excreted small molecule  
3 promotes *C. elegans* reproductive development and aging. *Nat Chem Biol* 15, 838-845.
- 4 Ludewig, A.H., and Schroeder, F.C. (2013). Ascaroside signaling in *C. elegans*. *WormBook* :  
5 the online review of *C. elegans* biology, 1-22.
- 6 Luo, F.J., Sclip, A., Jiang, M., and Sudhof, T.C. (2020). Neurexins cluster Ca<sup>2+</sup> channels  
7 within the presynaptic active zone. *Embo Journal* 39.
- 8 Mahoney, T.R., Luo, S., and Nonet, M.L. (2006). Analysis of synaptic transmission in  
9 *Caenorhabditis elegans* using an aldicarb-sensitivity assay. *Nat Protoc* 1, 1772-1777.
- 10 Maro, G.S., Gao, S.B., Olechwier, A.M., Hung, W.L., Liu, M., Ozkan, E., Zhen, M., and Shen,  
11 K. (2015). MADD-4/Punctin and Neurexin Organize *C. elegans* GABAergic Postsynapses  
12 through Neuroligin. *Neuron* 86, 1420-1432.
- 13 Maures, T.J., Booth, L.N., Benayoun, B.A., Izrayelit, Y., Schroeder, F.C., and Brunet, A. (2014).  
14 Males Shorten the Life Span of *C. elegans* Hermaphrodites via Secreted Compounds. *Science*  
15 343, 541-544.
- 16 Miyazaki, T., Takase, K., Nakajima, W., Tada, H., Ohya, D., Sano, A., Goto, T., Hirase, H.,  
17 Malinow, R., and Takahashi, T. (2012). Disrupted cortical function underlies behavior  
18 dysfunction due to social isolation. *J Clin Invest* 122, 2690-2701.
- 19 Morrow, E.M., Yoo, S.Y., Flavell, S.W., Kim, T.K., Lin, Y.X., Hill, R.S., Mukaddes, N.M., Balkhy,  
20 S., Gascon, G., Hashmi, A., *et al.* (2008). Identifying autism loci and genes by tracing recent  
21 shared ancestry. *Science* 321, 218-223.
- 22 Mowrey, W.R., Bennett, J.R., and Portman, D.S. (2014). Distributed Effects of Biological Sex  
23 Define Sex-Typical Motor Behavior in *Caenorhabditis elegans*. *Journal of Neuroscience* 34,  
24 1579-1591.
- 25 Nanou, E., and Catterall, W.A. (2018). Calcium Channels, Synaptic Plasticity, and  
26 Neuropsychiatric Disease. *Neuron* 98, 466-481.
- 27 Narayan, A., Venkatachalam, V., Durak, O., Reilly, D.K., Bose, N., Schroeder, F.C., Samuel,  
28 A.D.T., Srinivasan, J., and Sternberg, P.W. (2016). Contrasting responses within a single



1 neuron class enable sex-specific attraction in *Caenorhabditis elegans*. *P Natl Acad Sci USA*  
2 113, E1392-E1401.

3 Neale, B.M., Kou, Y., Liu, L., Ma'ayan, A., Samocha, K.E., Sabo, A., Lin, C.F., Stevens, C.,  
4 Wang, L.S., Makarov, V., *et al.* (2012). Patterns and rates of exonic de novo mutations in  
5 autism spectrum disorders. *Nature* 485, 242-245.

6 Ogawa, H., Harada, S., Sassa, T., Yamamoto, H., and Hosono, R. (1998). Functional  
7 properties of the *unc-64* gene encoding a *Caenorhabditis elegans* syntaxin. *Journal of*  
8 *Biological Chemistry* 273, 2192-2198.

9 Olmos-Serrano, J.L., Paluszkiwicz, S.M., Martin, B.S., Kaufmann, W.E., Corbin, J.G., and  
10 Huntsman, M.M. (2010). Defective GABAergic Neurotransmission and Pharmacological  
11 Rescue of Neuronal Hyperexcitability in the Amygdala in a Mouse Model of Fragile X  
12 Syndrome. *Journal of Neuroscience* 30, 9929-9938.

13 Orefice, L.L., Mosko, J.R., Morency, D.T., Wells, M.F., Tasnim, A., Mozeika, S.M., Ye, M.C.,  
14 Chirila, A.M., Emanuel, A.J., Rankin, G., *et al.* (2019). Targeting Peripheral Somatosensory  
15 Neurons to Improve Tactile-Related Phenotypes in ASD Models. *Cell* 178, 867-886.

16 Pevsner, J., Hsu, S.C., Braun, J.E.A., Calakos, N., Ting, A.E., Bennett, M.K., and Scheller,  
17 R.H. (1994). Specificity and Regulation of a Synaptic Vesicle Docking Complex. *Neuron* 13,  
18 353-361.

19 Philbrook, A., Ramachandran, S., Lambert, C.M., Oliver, D., Florman, J., Alkema, M.J.,  
20 Lemons, M., and Francis, M.M. (2018). Neurexin directs partner-specific synaptic connectivity  
21 in *C-elegans*. *Elife* 7.

22 Pouloupoulos, A., Aramuni, G., Meyer, G., Soykan, T., Hoon, M., Papadopoulos, T., Zhang,  
23 M.Y., Paarmann, I., Fuchs, C., Harvey, K., *et al.* (2009). Neuroligin 2 Drives Postsynaptic  
24 Assembly at Perisomatic Inhibitory Synapses through Gephyrin and Collybistin. *Neuron* 63,  
25 628-642.

26 Qi, Y.B., Garren, E.J., Shu, X., Tsien, R.Y., and Jin, Y. (2012). Photo-inducible cell ablation in  
27 *Caenorhabditis elegans* using the genetically encoded singlet oxygen generating protein  
28 miniSOG. *Proc Natl Acad Sci U S A* 109, 7499-7504.

- 1 Rechavi, O., Minevich, G., and Hobert, O. (2011). Transgenerational Inheritance of an  
2 Acquired Small RNA-Based Antiviral Response in *C. elegans*. *Cell* 147, 1248-1256.
- 3 Richmond, J.E., Davis, W.S., and Jorgensen, E.M. (1999). UNC-13 is required for synaptic  
4 vesicle fusion in *C. elegans*. *Nat Neurosci* 2, 959-964.
- 5 Richmond, J.E., and Jorgensen, E.M. (1999). One GABA and two acetylcholine receptors  
6 function at the *C. elegans* neuromuscular junction. *Nat Neurosci* 2, 791-797.
- 7 Rizo, J., and Sudhof, T.C. (2012). The Membrane Fusion Enigma: SNAREs, Sec1/Munc18  
8 Proteins, and Their Accomplices-Guilty as Charged? *Annu Rev Cell Dev Bi* 28, 279-308.
- 9 Shi, C., and Murphy, C.T. (2014). Mating Induces Shrinking and Death in *Caenorhabditis*  
10 *Mothers*. *Science* 343, 536-540.
- 11 Shi, C., Runnels, A.M., and Murphy, C.T. (2017). Mating and male pheromone kill  
12 *Caenorhabditis* males through distinct mechanisms. *Elife* 6.
- 13 Srinivasan, J., Kaplan, F., Ajredini, R., Zachariah, C., Alborn, H.T., Teal, P.E., Malik, R.U.,  
14 Edison, A.S., Sternberg, P.W., and Schroeder, F.C. (2008). A blend of small molecules  
15 regulates both mating and development in *Caenorhabditis elegans*. *Nature* 454, 1115-1118.
- 16 Srinivasan, J., von Reuss, S.H., Bose, N., Zaslaver, A., Mahanti, P., Ho, M.C., O'Doherty,  
17 O.G., Edison, A.S., Sternberg, P.W., and Schroeder, F.C. (2012). A Modular Library of Small  
18 Molecule Signals Regulates Social Behaviors in *Caenorhabditis elegans*. *Plos Biol* 10.
- 19 Sudhof, T.C. (2008). Neuroligins and neurexins link synaptic function to cognitive disease.  
20 *Nature* 455, 903-911.
- 21 Tchenio, A., Lecca, S., Valentinova, K., and Mameli, M. (2017). Limiting habenular  
22 hyperactivity ameliorates maternal separation-driven depressive-like symptoms. *Nat Commun*  
23 8.
- 24 Tian, L., Hires, S.A., Mao, T., Huber, D., Chiappe, M.E., Chalasani, S.H., Petreanu, L.,  
25 Akerboom, J., McKinney, S.A., Schreiter, E.R., *et al.* (2009). Imaging neural activity in worms,  
26 flies and mice with improved GCaMP calcium indicators. *Nature Methods* 6, 875-881.
- 27 Tong, X.J., Hu, Z.T., Liu, Y., Anderson, D., and Kaplan, J.M. (2015). A network of autism linked  
28 genes stabilizes two pools of synaptic GABA(A) receptors. *Elife* 4.

- 1 Tong, X.J., Lopez-Soto, E.J., Li, L., Liu, H.W., Nedelcu, D., Lipscombe, D., Hu, Z.T., and  
2 Kaplan, J.M. (2017). Retrograde Synaptic Inhibition Is Mediated by alpha-Neurexin Binding to  
3 the alpha 2 delta Subunits of N-Type Calcium Channels. *Neuron* 95, 326-340.
- 4 Tu, H.J., Pinan-Lucarre, B., Ji, T.T., Jospin, M., and Bessereau, J.L. (2015). C. elegans  
5 Punctin Clusters GABA(A) Receptors via Neuroligin Binding and UNC-40/DCC Recruitment.  
6 *Neuron* 86, 1407-1419.
- 7 Vashlishan, A.B., Madison, J.M., Dybbs, M., Bai, J., Sieburth, D., Ch'ng, Q., Tavazoie, M., and  
8 Kaplan, J.M. (2008). An RNAi screen identifies genes that regulate GABA synapses. *Neuron*  
9 58, 346-361.
- 10 von Reuss, S.H., Bose, N., Srinivasan, J., Yim, J.J., Judkins, J.C., Sternberg, P.W., and  
11 Schroeder, F.C. (2012). Comparative Metabolomics Reveals Biogenesis of Ascarosides, a  
12 Modular Library of Small-Molecule Signals in C. elegans. *J Am Chem Soc* 134, 1817-1824.
- 13 Wallace, M.L., Burette, A.C., Weinberg, R.J., and Philpot, B.D. (2012). Maternal Loss of  
14 Ube3a Produces an Excitatory/Inhibitory Imbalance through Neuron Type-Specific Synaptic  
15 Defects. *Neuron* 74, 793-800.
- 16 Wan, X., Zhou, Y., Chan, C.M., Yang, H.N., Yeung, C., and Chow, K.L. (2019). SRD-1 in AWA  
17 neurons is the receptor for female volatile sex pheromones in C. elegans males. *Embo*  
18 *Reports* 20.
- 19 Whitaker, L.R., Degoulet, M., and Morikawa, H. (2013). Social Deprivation Enhances VTA  
20 Synaptic Plasticity and Drug-Induced Contextual Learning. *Neuron* 77, 335-345.
- 21 Wu, T., Duan, F., Yang, W., Liu, H., Caballero, A., Fernandes de Abreu, D.A., Dar, A.R.,  
22 Alcedo, J., Ch'ng, Q., Butcher, R.A., *et al.* (2019). Pheromones Modulate Learning by  
23 Regulating the Balanced Signals of Two Insulin-like Peptides. *Neuron* 104, 1095-1109.
- 24 Yin, J.A., Gao, G., Liu, X.J., Hao, Z.Q., Li, K., Kang, X.L., Li, H., Shan, Y.H., Hu, W.L., Li, H.P.,  
25 *et al.* (2017). Genetic variation in glia-neuron signalling modulates ageing rate. *Nature* 551,  
26 198-203.
- 27 Yuen, R.K.C., Merico, D., Bookman, M., Howe, J.L., Thiruvahindrapuram, B., Patel, R.V.,  
28 Whitney, J., Deflaux, N., Bingham, J., Wang, Z.Z., *et al.* (2017). Whole genome sequencing

- 1 resource identifies 18 new candidate genes for autism spectrum disorder. *Nat Neurosci* 20,  
2 602-611.
- 3 Zamponi, G.W. (2016). Targeting voltage-gated calcium channels in neurological and  
4 psychiatric diseases. *Nat Rev Drug Discov* 15, 19-34.
- 5 Zhang, X., Noguez, J.H., Zhou, Y., and Butcher, R.A. (2013). Analysis of ascarosides from  
6 *Caenorhabditis elegans* using mass spectrometry and NMR spectroscopy. *Methods Mol Biol*  
7 1068, 71-92.
- 8 Zhou, Y., Wang, Y.T., Zhang, X.X., Bhar, S., Jones, R.A.L., Han, J., Feng, L.K., and Butcher,  
9 R.A. (2018). Biosynthetic tailoring of existing ascaroside pheromones alters their biological  
10 function in *C. elegans*. *Elife* 7.
- 11 Zou, W.J., Fu, J.J., Zhang, H.N., Du, K., Huang, W.M., Yu, J.W., Li, S.T., Fan, Y.D., Baylis,  
12 H.A., Gao, S.B., *et al.* (2018). Decoding the intensity of sensory input by two glutamate  
13 receptors in one *C-elegans* interneuron. *Nat Commun* 9.

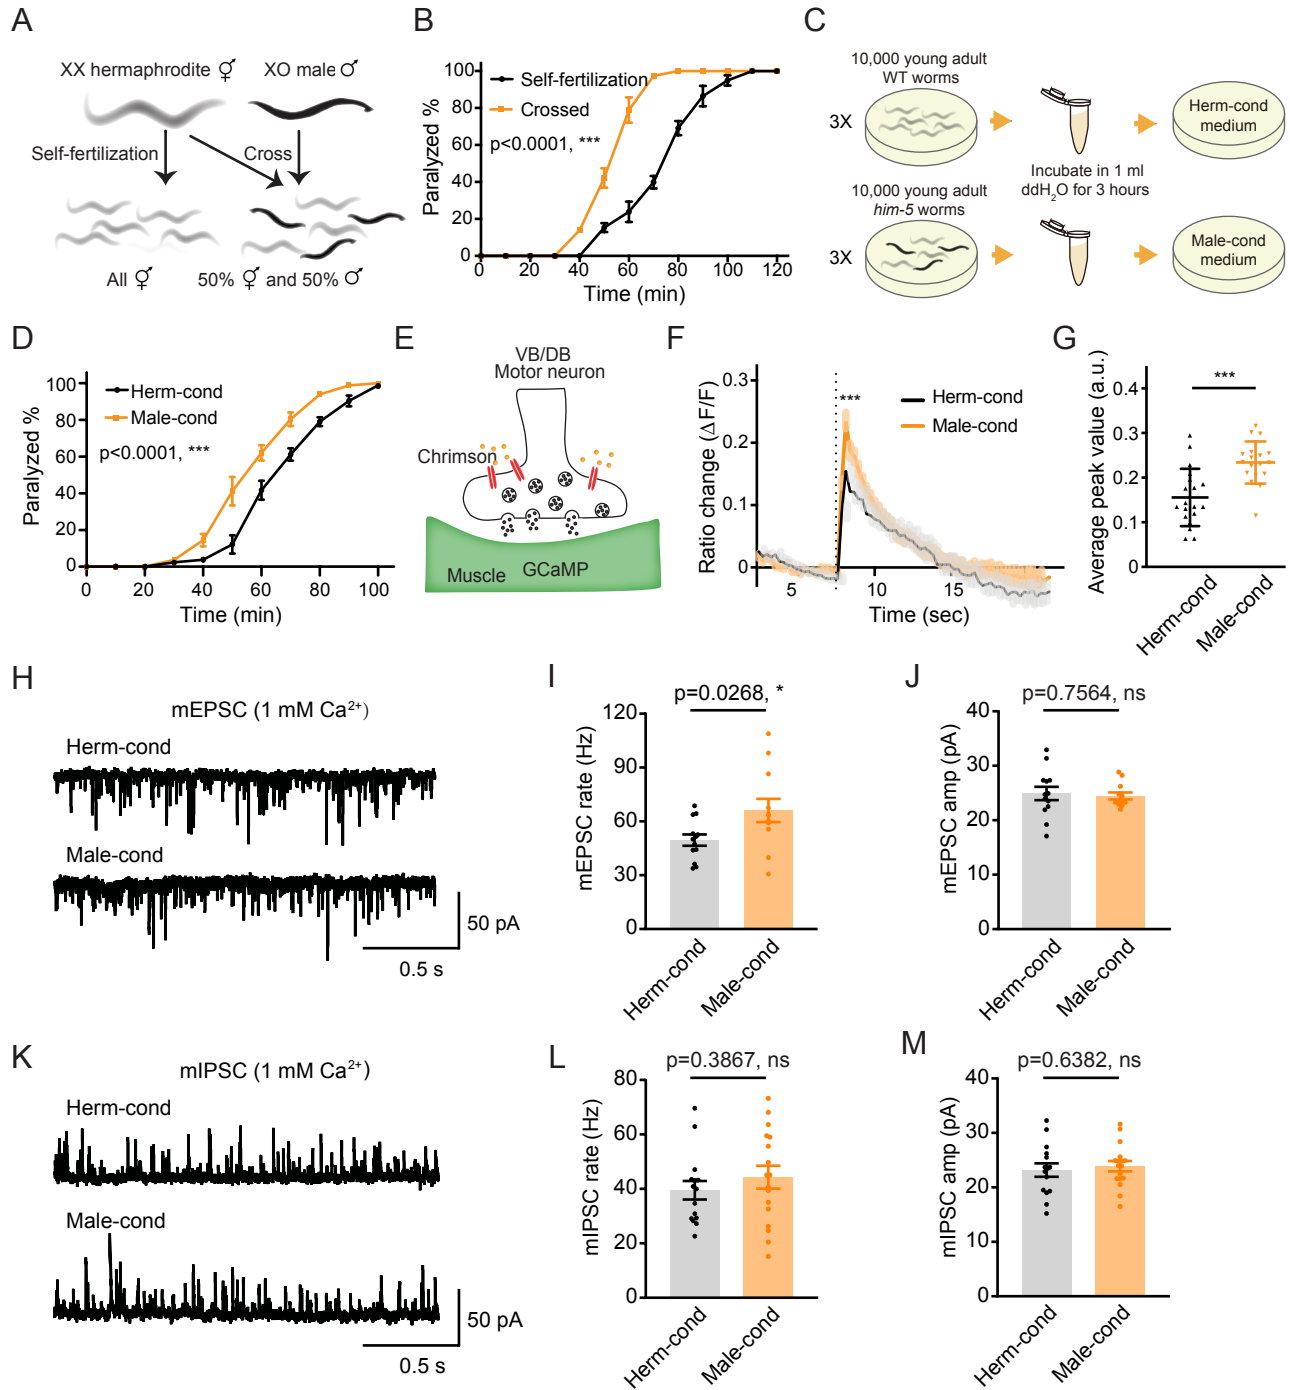

Qian *et al.* Fig. 1

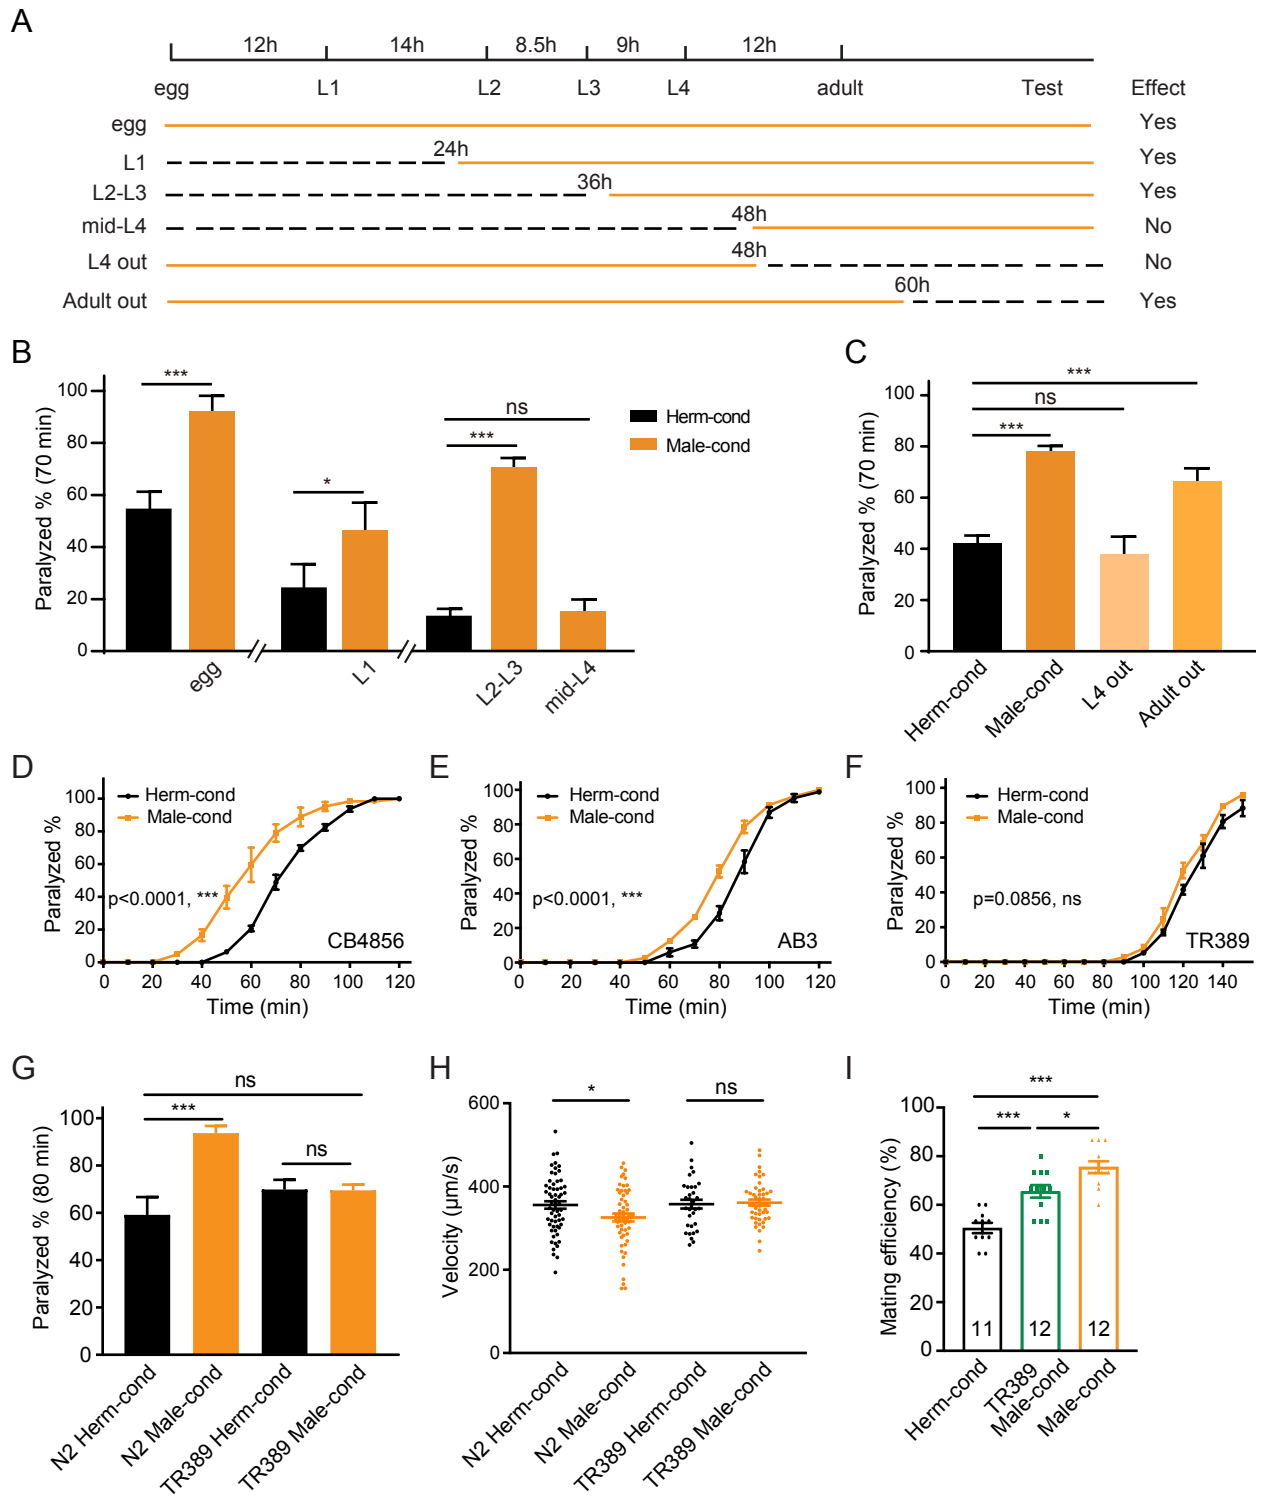

Qian *et al.* Fig. 2

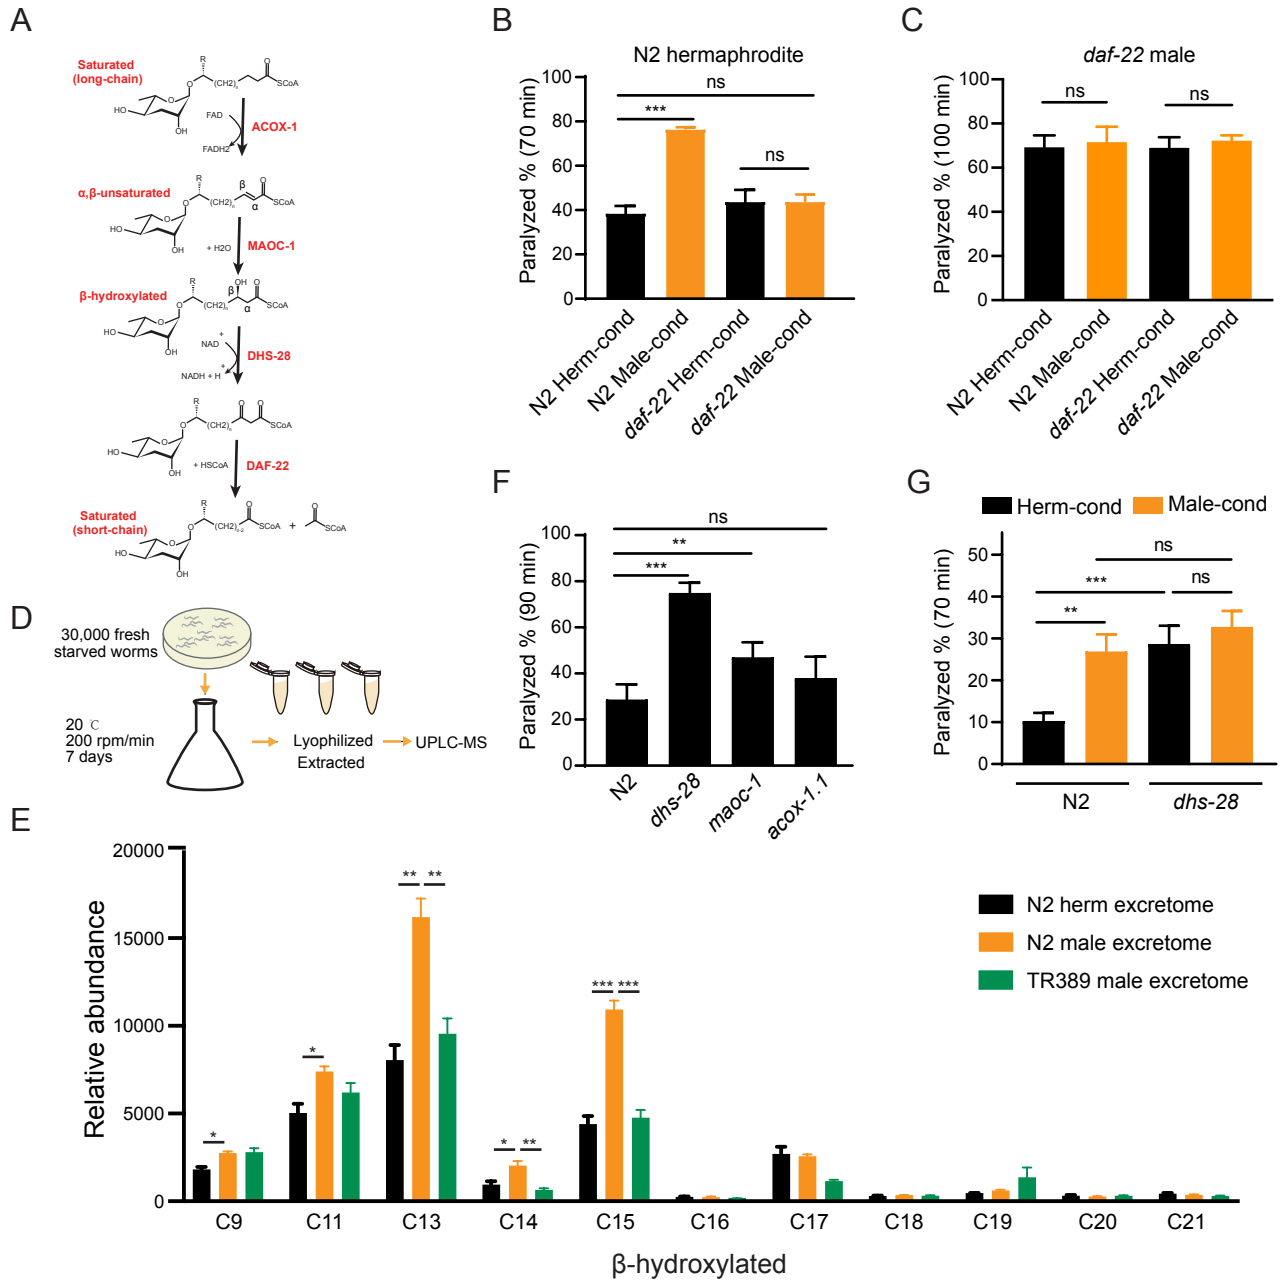

Qian *et al.* Fig. 3

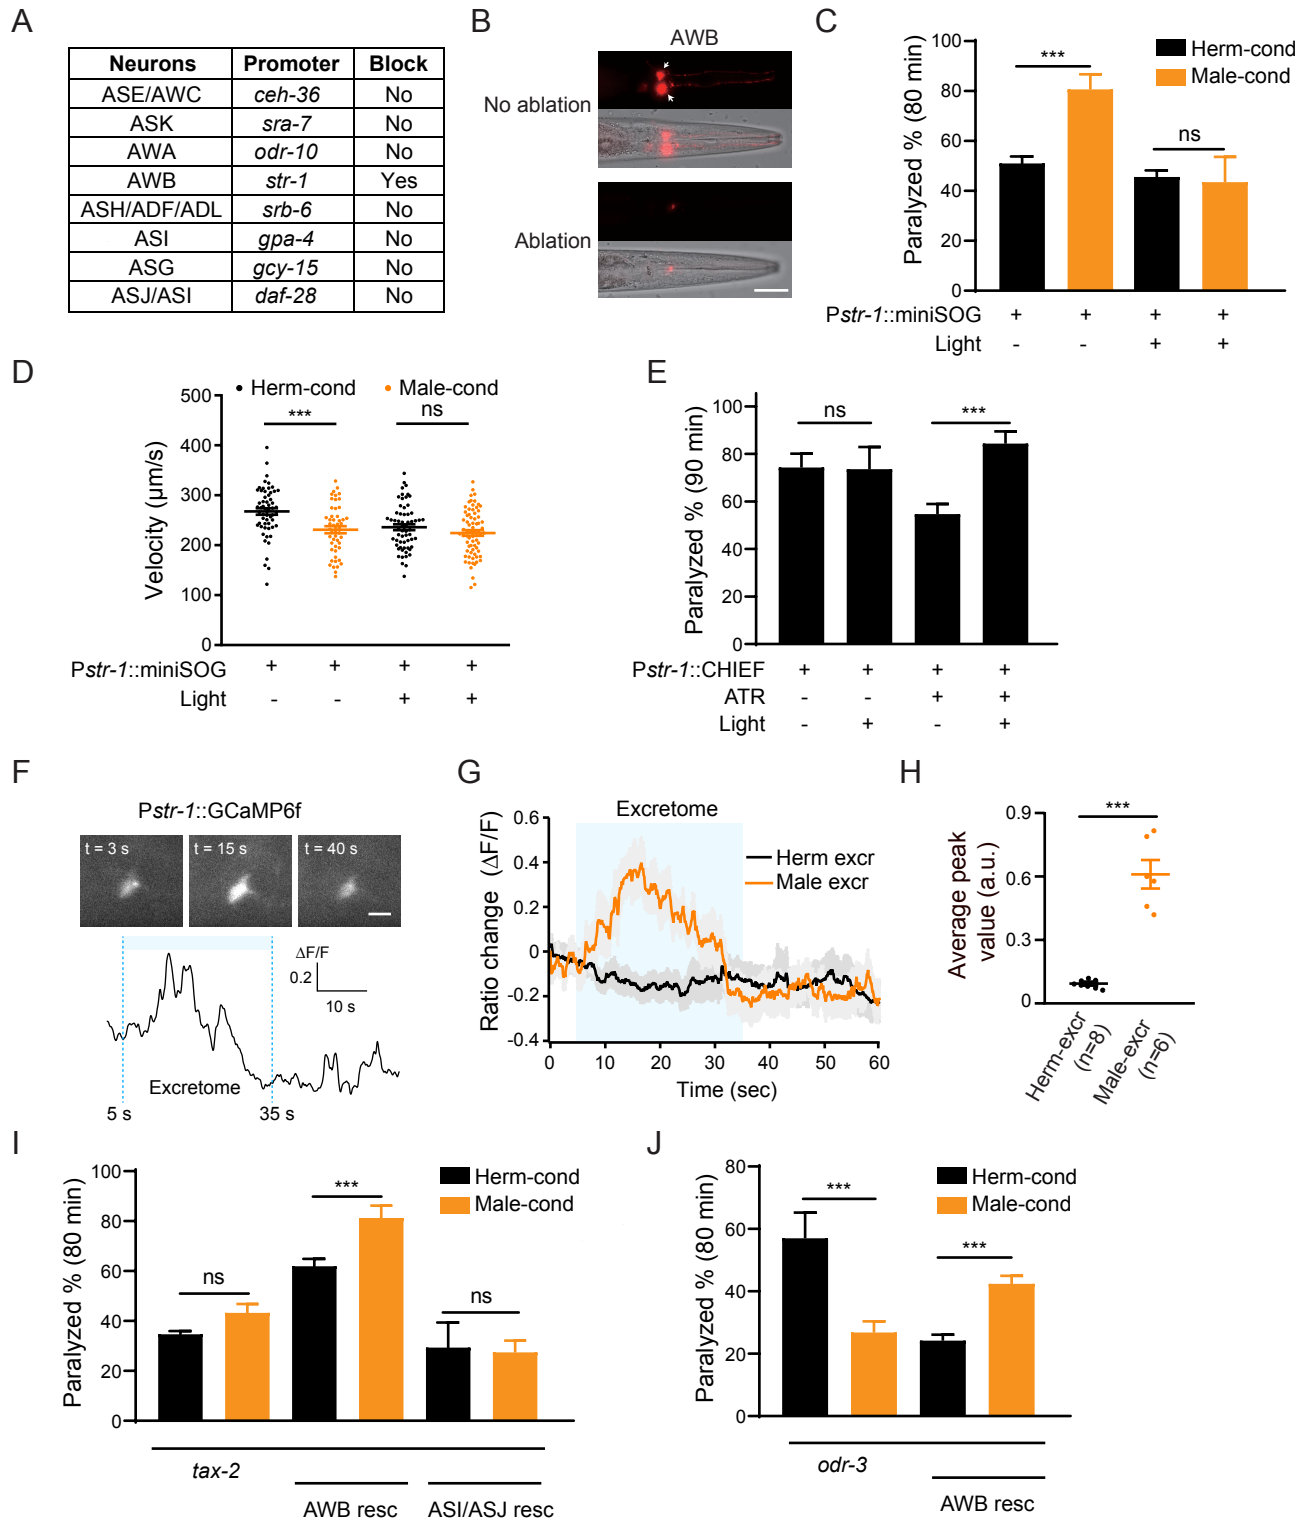

Qian *et al.* Fig. 4



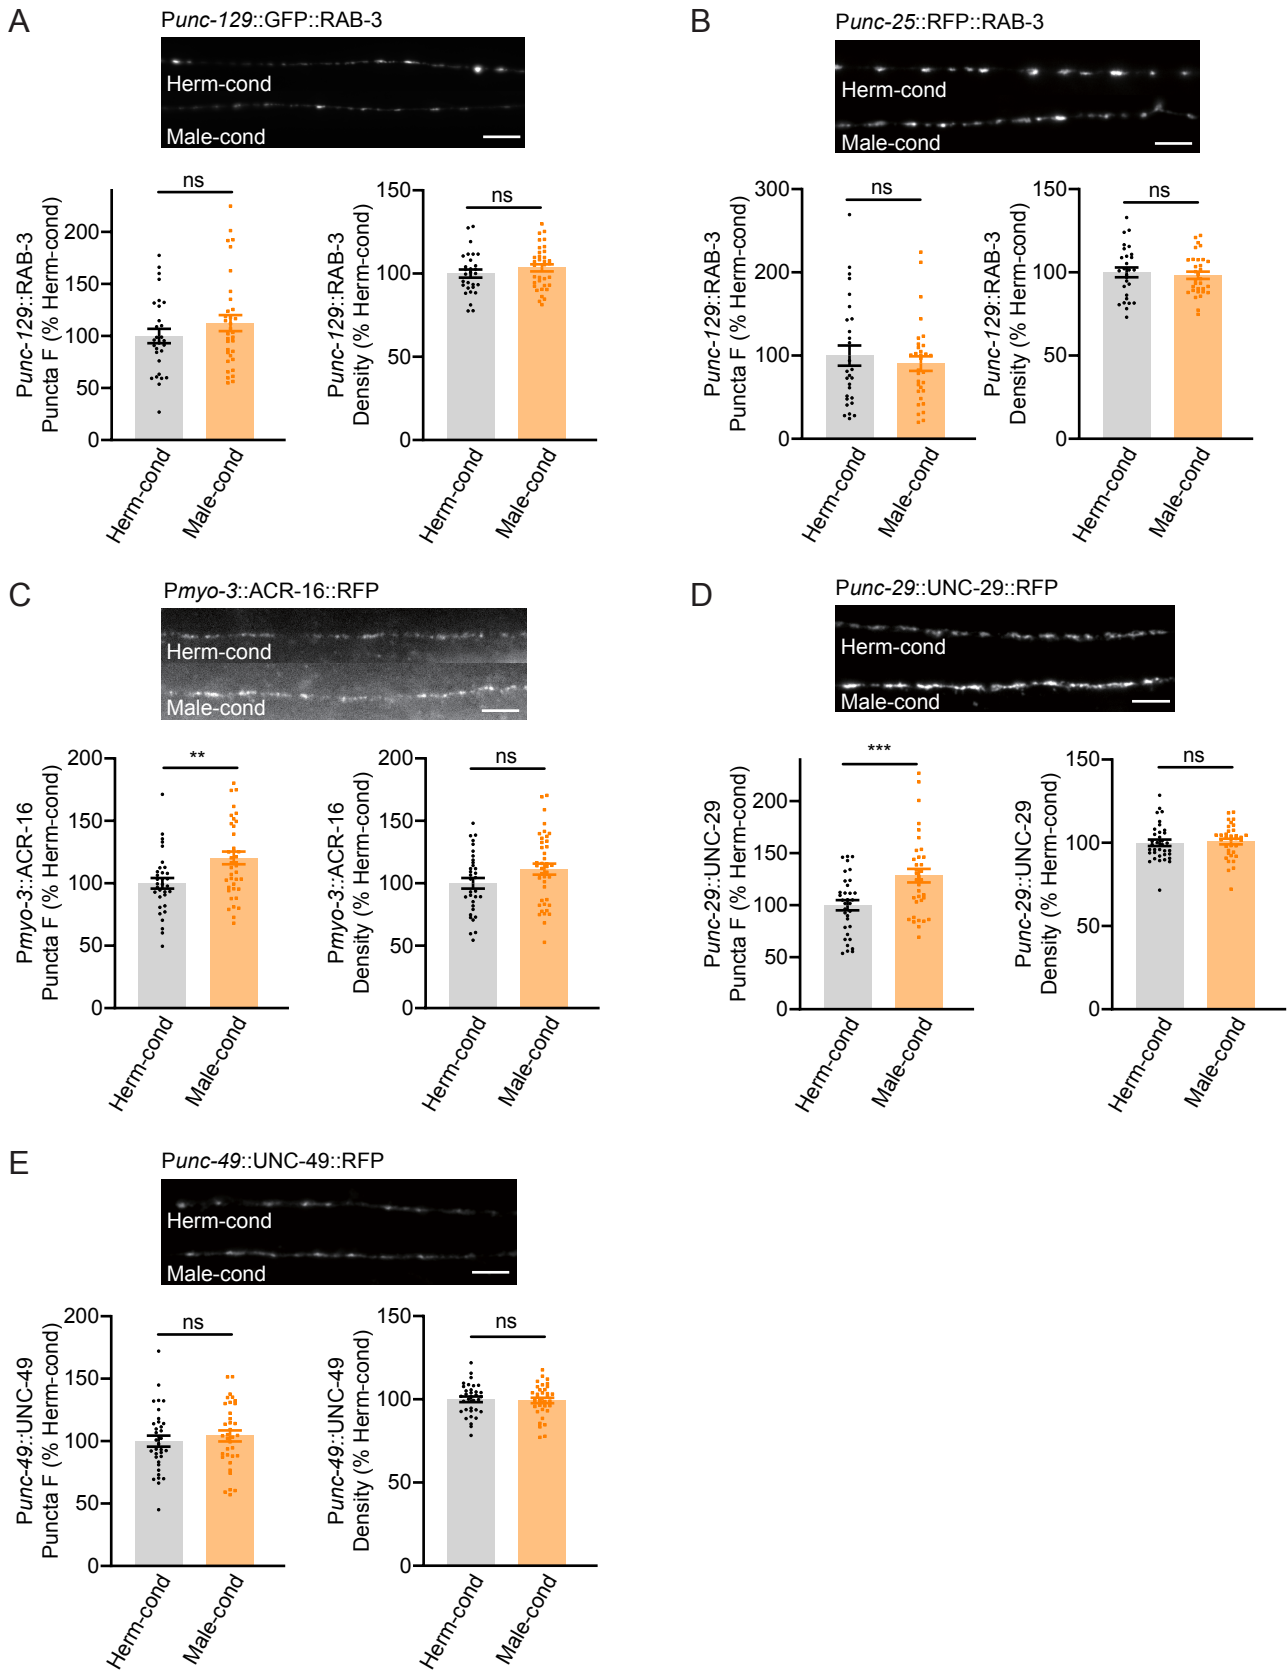

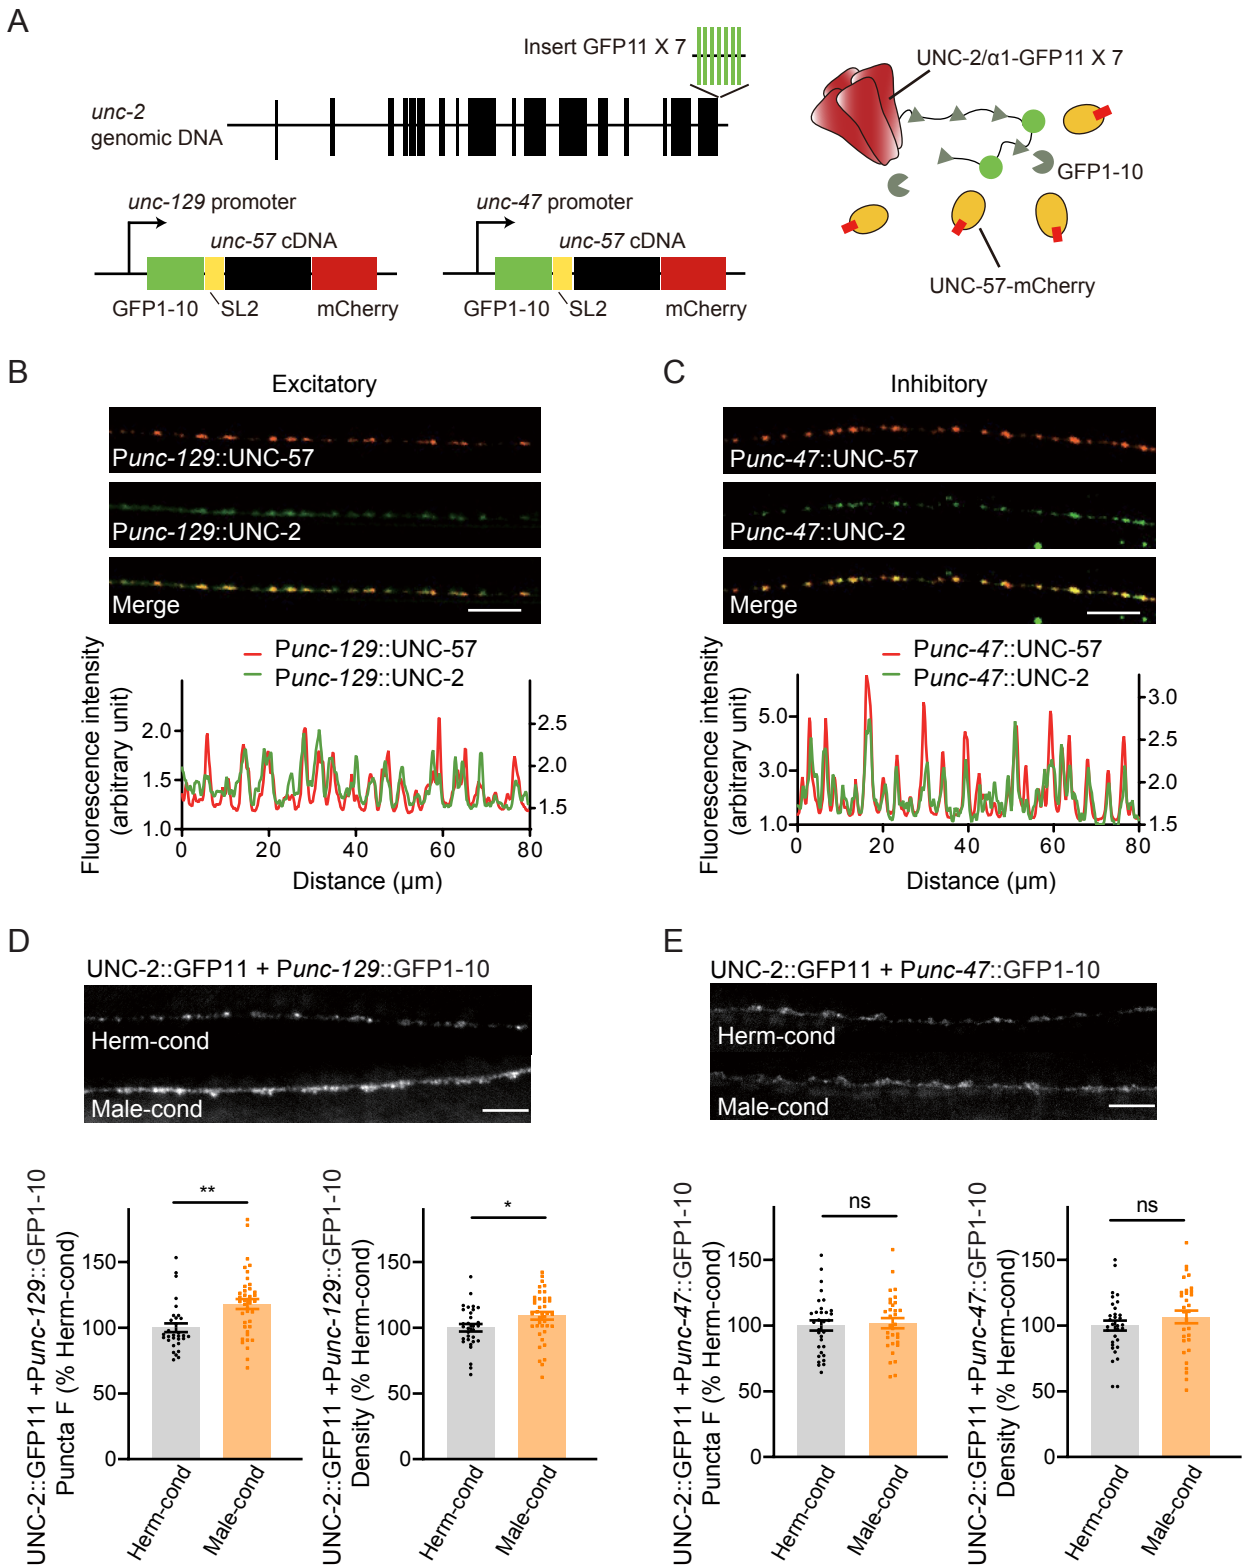

Qian *et al.* Fig. 6

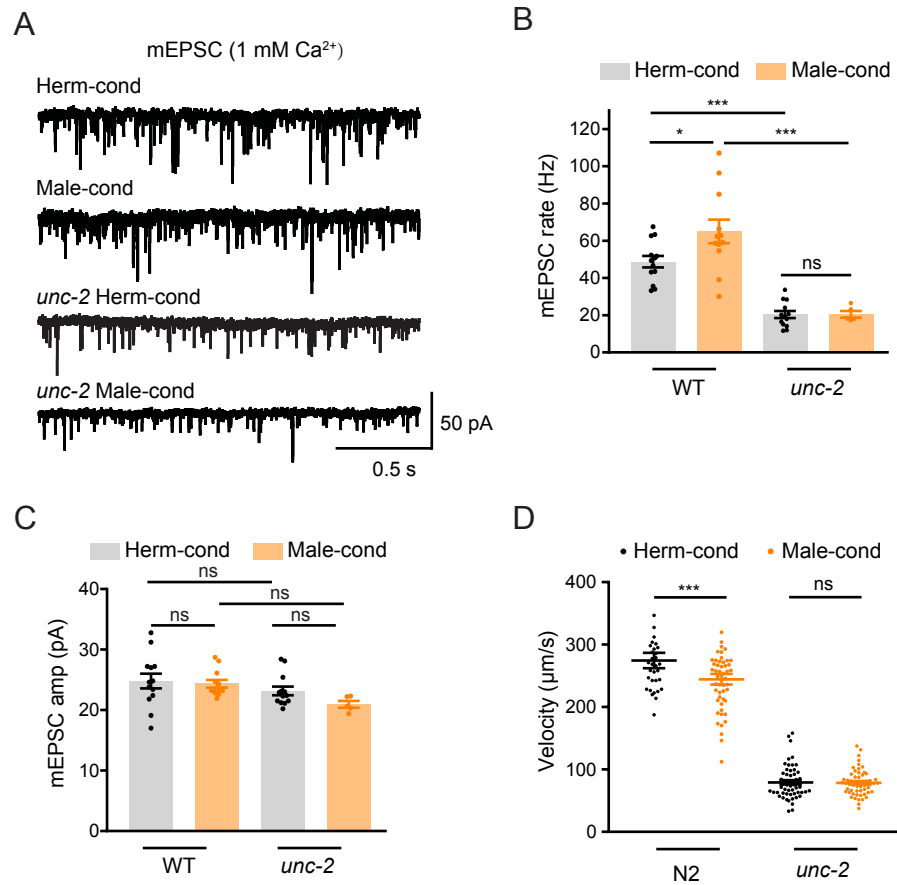

Qian *et al.* Fig. 7

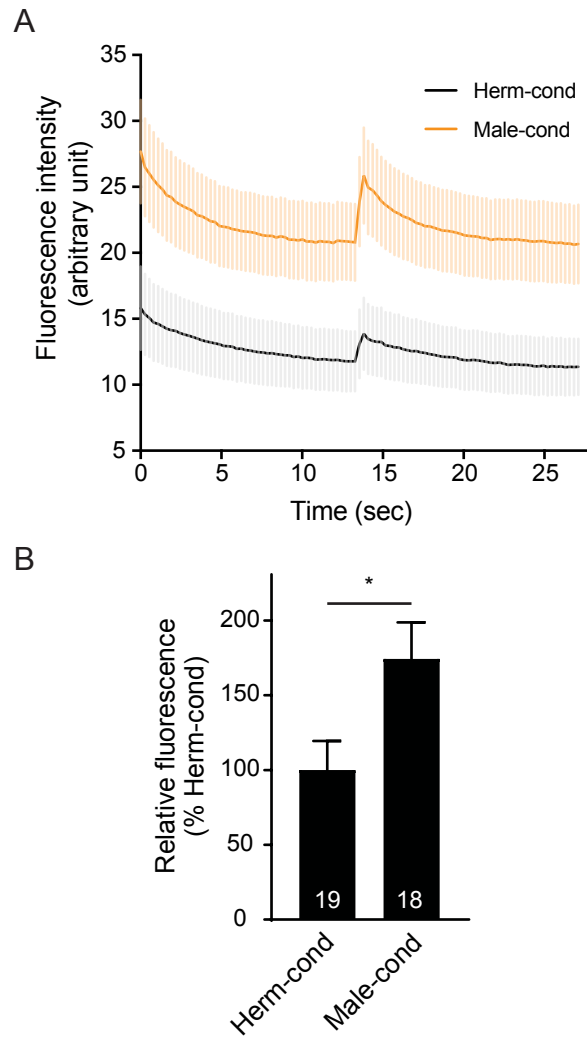

Qian *et al.* Supplementary Fig. 1

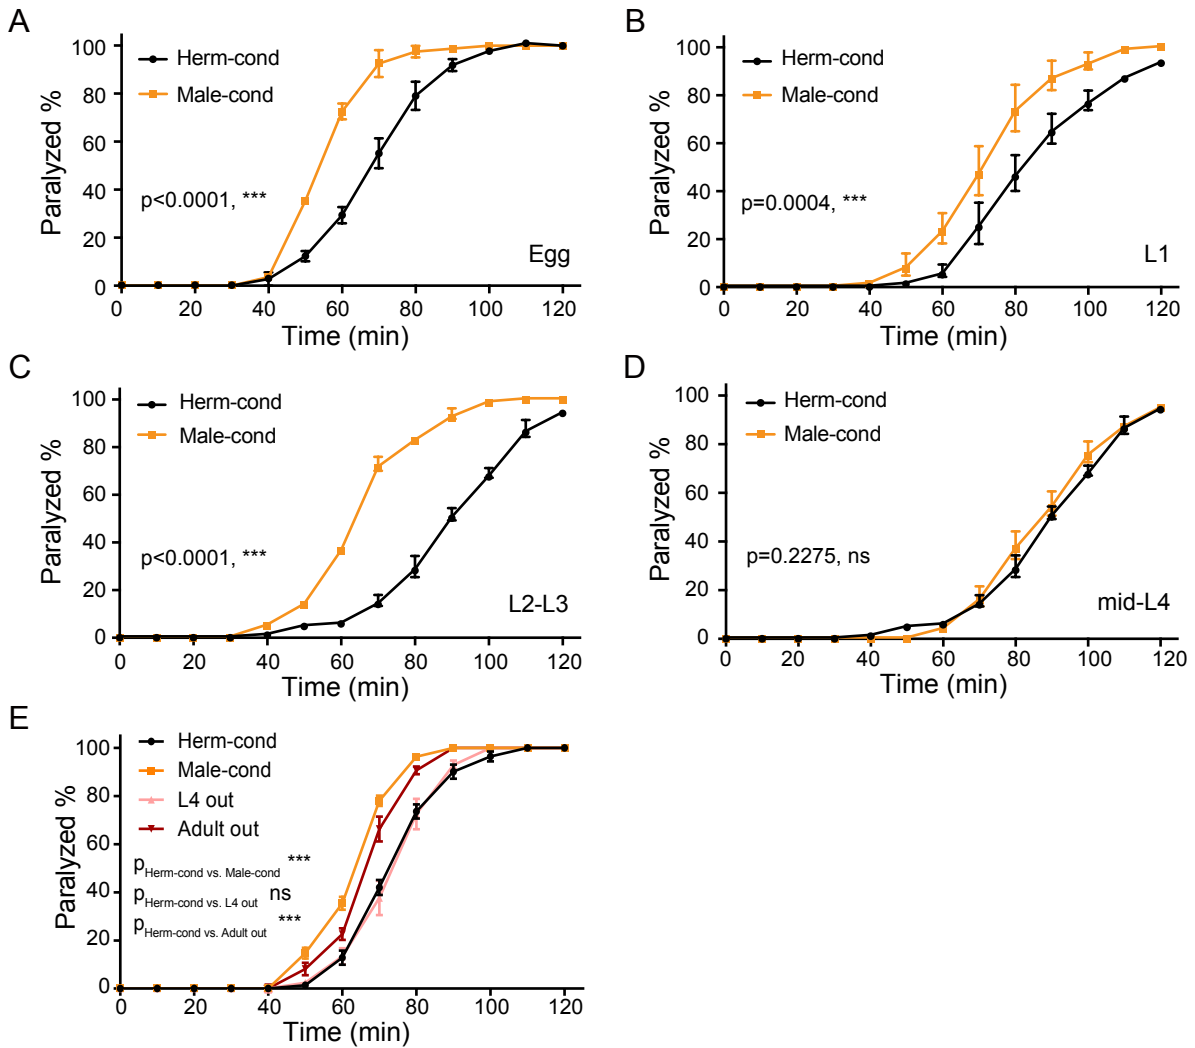

Qian *et al.* Supplementary Fig. 2

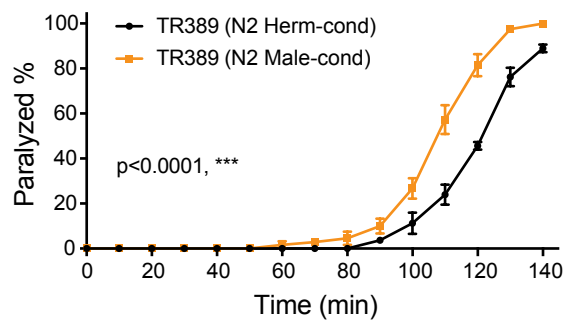

Qian *et al.* Supplementary Fig. 3

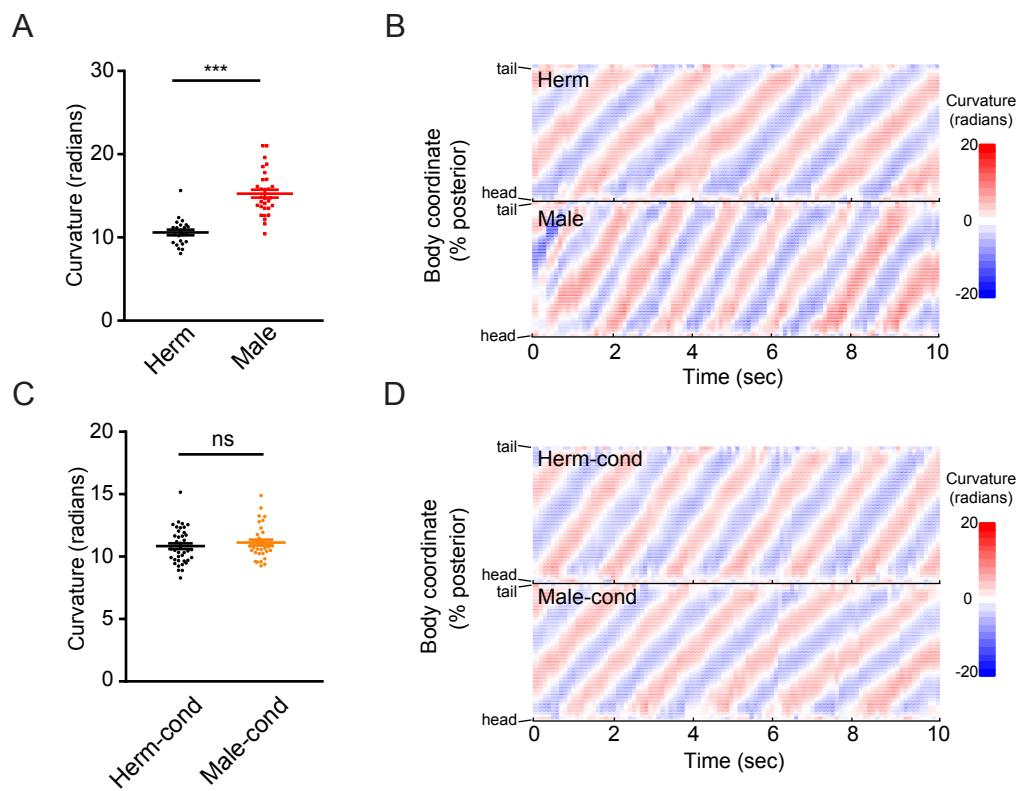

Qian *et al.* Supplementary Fig. 4

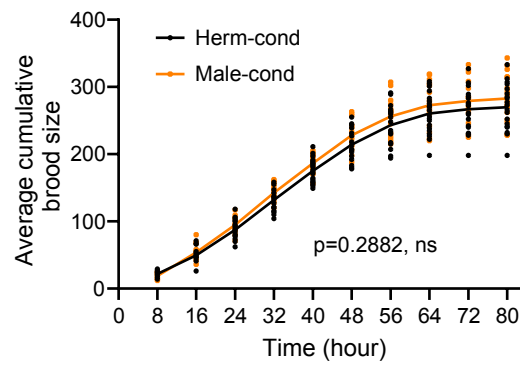

Qian *et al.* Supplementary Fig. 5



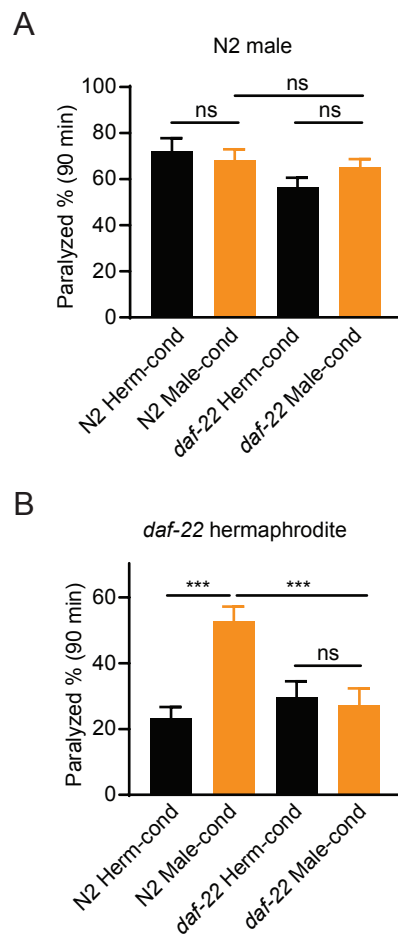

Qian *et al.* Supplementary Fig. 6

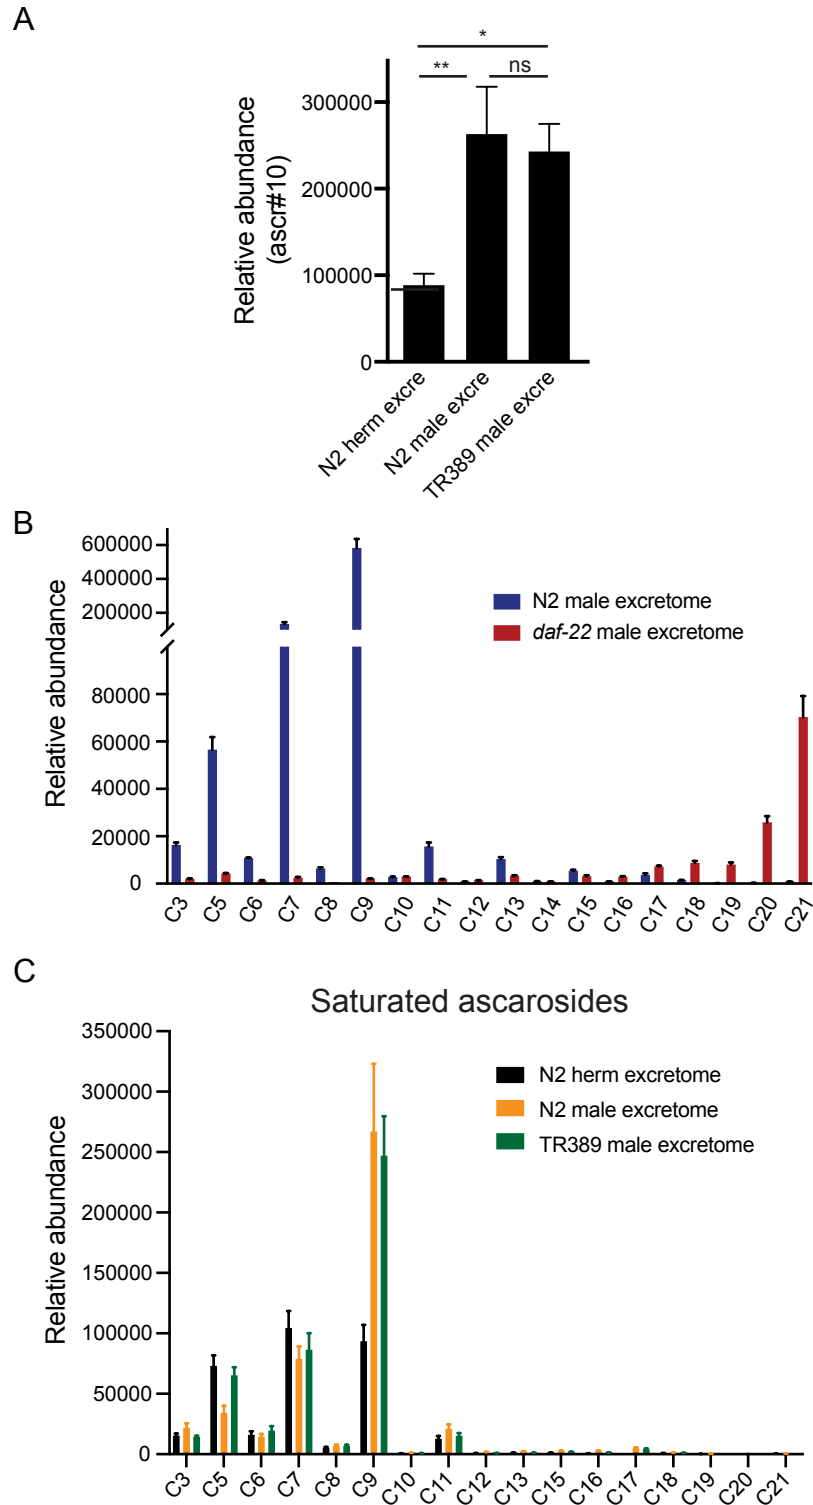

Qian *et al.* Supplementary Fig. 7

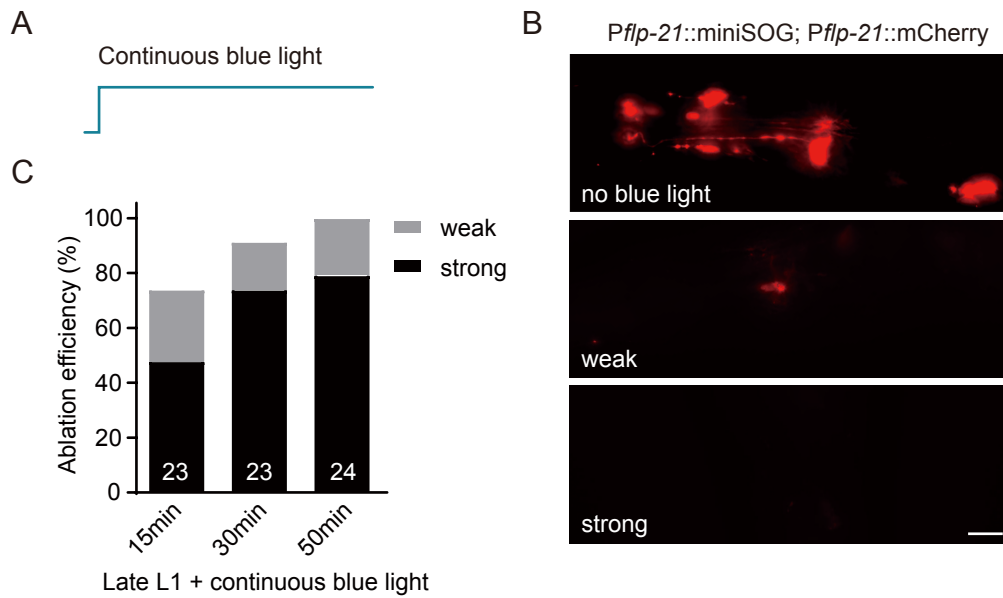

Qian *et al.* Supplementary Fig. 8

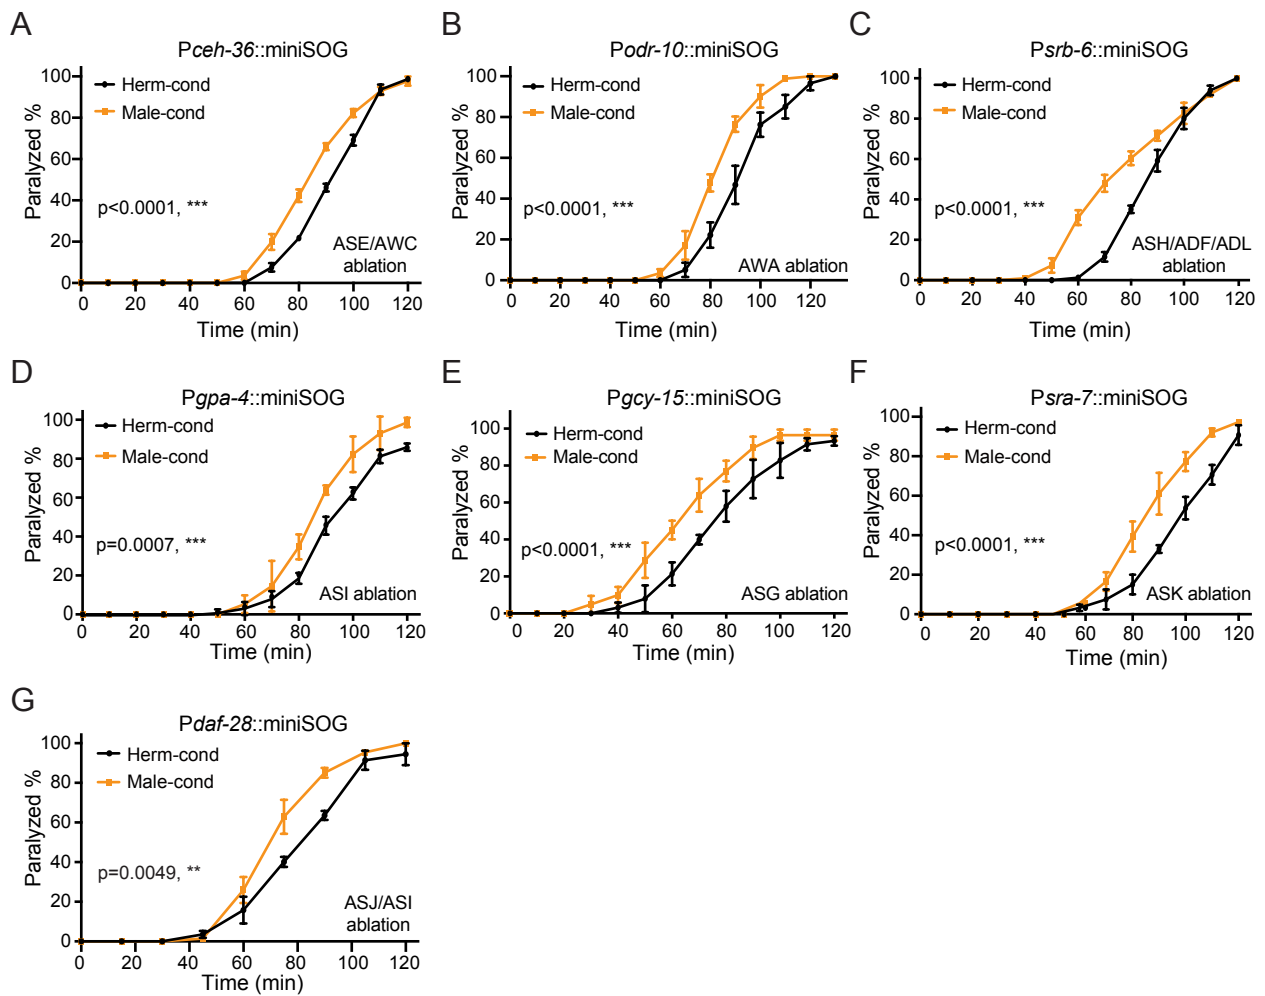

Qian *et al.* Supplementary Fig. 9

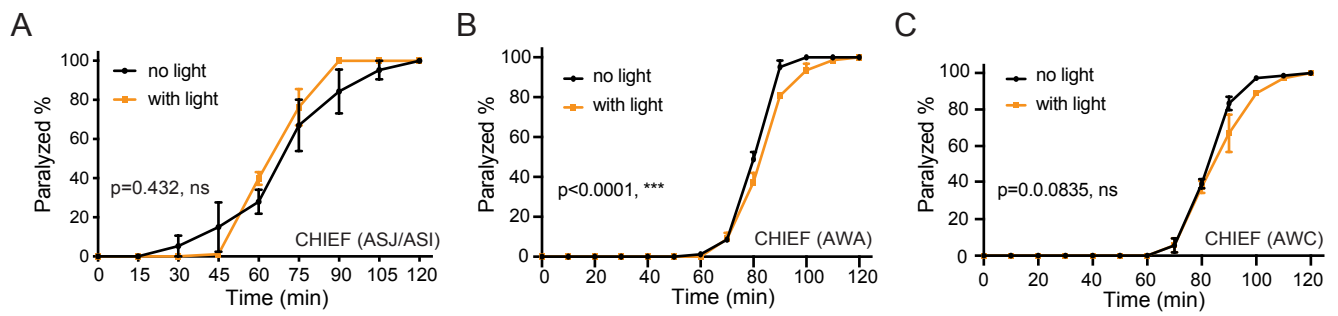

Qian *et al.* Supplementary Fig. 10

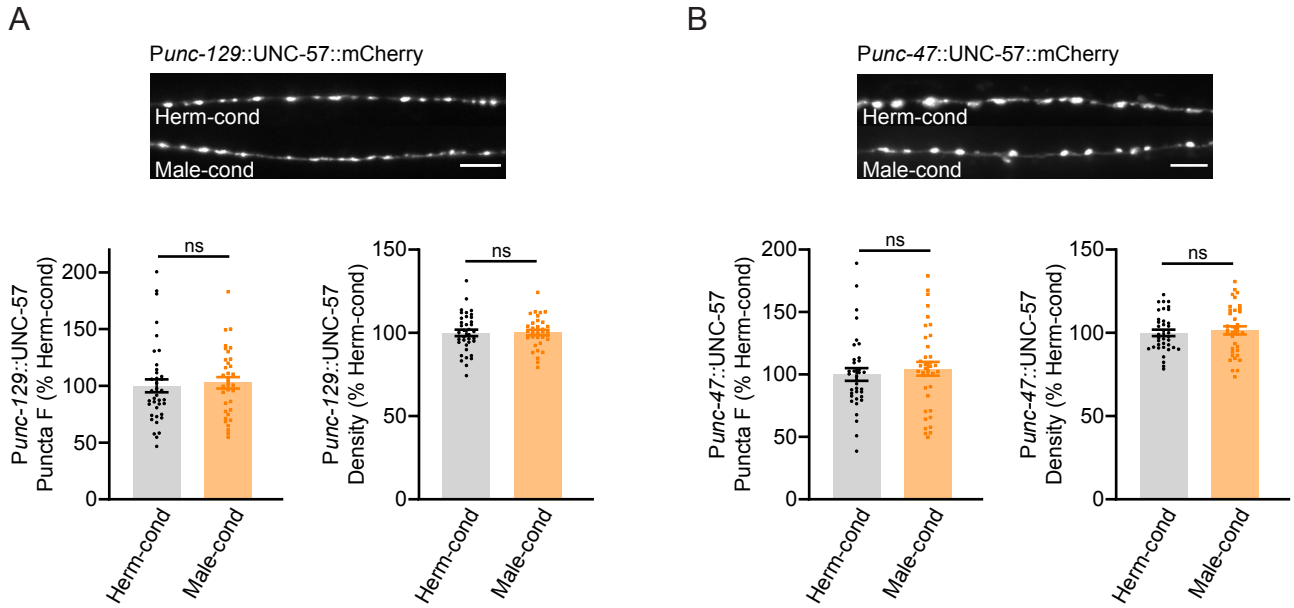

Source: https://www.biorxiv.org/content/biorxiv/early/2021/02/09/2021.02.09.430459.full.pdf
